# Supplementary material
Source: PubMed Central journal article supplement (PMC7612251)
Supplement: EMS140840-supplement-Appendix.pdf [file EMS140840-supplement-Appendix.pdf]

## Appendix

### Appendix 1 Analysis plan

|                    |                                                                                                                                                                            |
|--------------------|----------------------------------------------------------------------------------------------------------------------------------------------------------------------------|
| <b>Study title</b> | <b>Iron treatments (Fe) in Reproductive age women with Iron Deficiency Anaemia (FRIDA): a systematic review with network meta-analysis of randomised controlled trials</b> |
|--------------------|----------------------------------------------------------------------------------------------------------------------------------------------------------------------------|

#### 1. Introduction

##### 1.1. Clinical background

Iron deficiency is the commonest nutritional deficiency worldwide. Women of reproductive age are more prone to iron deficiency due to the i) regular loss of blood secondary to the menstrual cycles ii) the increased iron demands of pregnancy and childbirth and iii) physiological differences in iron metabolism as compared to men. Iron deficiency is a progressive process, where the body's iron stores move from being replete to deficient to absent. Absent iron stores lead to a reduction in haemoglobin, which termed anaemia. Anaemia can also be caused by other nutritional deficiencies (vitamin B12 and folate) and structural changes in haemoglobin (termed haemoglobinopathies including thalassemia and sickle cell disease), which are not included in this review.

##### 1.2. Overall study design

**Study Design:** Network Meta-Analysis (NMA) of randomised controlled trials (RCTs)

**Interventions/Comparator:** Iron treatment in any formulation, regime and form of administration compared to other iron treatment, placebo, vitamin or mineral supplement, or no treatment.

##### 1.3. Purpose of the analysis plan

The purpose of this document is to provide details of the statistical analyses and presentation of results to be reported within the main outputs of Iron treatments (Fe) in Reproductive age women with Iron Deficient Anaemia (FRIDA) study. Any exploratory, post-hoc or unplanned analyses will be clearly identified in the respective study analysis report.

The following guidelines were reviewed in preparation for writing this document:

1. Study protocol (PROSPERO [CRD42018100822](https://doi.org/10.1186/1745-6215-42018100822))
2. Reporting guidelines PRISMA-NMA (1)

##### 1.4. Review team

Dr Ewelina Rogozinska, Queen Mary University of London

Dr Jahnavi Daru, Queen Mary University of London

Mr Marios Nicolaidis, Queen Mary University of London

Dr Carmen Amezcua, Universidad de Granada

Ms Elena Stallings, Hospital Universitario Ramón y Cajal

Dr Rui Wang, Monash University and University of Adelaide, Australia

Dr Susan Robinson, Guy's and St Thomas' Hospital

Dr Carlos Martín Saborido, Hospital La Paz Institute for Health Research (IdiPAZ)

Prof Javier Zamora, Queen Mary University of London; Hospital Universitario Ramón y Cajal

Prof Khalid S Khan, Queen Mary University of London, UK

Prof Shakila Thangaratinam, Queen Mary University of London, UK

Ewelina Rogozińska, Jahnvi Daru, Rui Wang, Carlos Saborido and Javier Zamora were primarily responsible for writing the Statistical Analysis Strategy. Ewelina Rogozińska will be responsible for writing the statistical software syntax (code) that subsequently will be verified by Carlos Saborido. Ewelina Rogozińska will implement the statistical strategy at the point of analysis.

## **2. Study objectives**

### **2.1. Primary objective**

To compare the relative effectiveness of different iron preparations offered to women of reproductive age with iron deficiency anaemia on haemoglobin levels within three distinctive populations: i) menstruating, ii) pregnant, and iii) postpartum women.

### **2.2. Secondary objective**

To compare different iron preparations offered to women of reproductive age women with iron deficiency anaemia based on their effect on serum ferritin levels and side effects profile within three distinctive populations: i) menstruating, ii) pregnant, and iii) postpartum women.

## **3. Outcome measures**

### **3.1. Primary outcome(s)**

Haemoglobin (Hb) level as reported in the eligible trials. The preference will be towards Hb post-treatment levels, however we will also collect Hb level reported as mean change from baseline and/or achievement of pre-defined Hb threshold.

### **3.2. Secondary outcome(s)**

Serum ferritin (SF) level as reported in the eligible trials. The preference will be towards SF post-treatment levels, however we will also collect SF level reported as mean change from baseline and/or achievement of pre-defined SF threshold.

Any adverse reaction to the treatment collected, will be categorised as severe and non-severe. If the data permit, we will attempt to collect data on following outcomes: death, quality of life, infection, admission to the hospital, and need for blood transfusion.

#### **4. Identification of relevant studies**

##### **5.1. Literature search**

We will search Cochrane Central Register of Controlled Trials (CENTRAL) to identify studies on effectiveness of iron treatments (any treatment versus any other treatment, placebo, vitamin supplementation or no treatment) in women of reproductive age group. Where required, we will either undertake new searches in Medline (via Ovid), Embase, Scopus, Web of Science and SciELO if there are no relevant Cochrane reviews, or update the search to-date for the relevant Cochrane reviews with the literature searches older than one year. We will not apply any language limitations.

For the additional search strategies, we will use the terms listed in the Cochrane reviews combining three main domains: 'women' (pregnant or non-pregnant separately), 'iron deficiency anaemia', and 'randomised control trial' design. The database search will be supplemented with an exploration of grey literature in SIGLE, trial registers (Clinical Trials Gov., ANZCTR, EU Clinical Trial Register, ISRCTN) and general Internet search (Google and Google Scholar) for any completed trials with published results not identified in the literature search (non-indexed publications).

Two reviewers will independently evaluate all citations and studies against inclusion criteria. In case of disagreement, we will seek the opinion of a third reviewer. We will develop a list of all evaluated studies with reasons for exclusion for studies considered as not meeting the inclusion criteria.

##### **5.2. Inclusion and exclusion criteria**

We will include RCTs with randomisation on a cluster or individual level that included women of reproductive age with iron deficiency anaemia. We will exclude women with known chronic conditions, which likely influence laboratory blood parameters, e.g. chronic kidney disease or those with cancer. The RCTs have to evaluate one or more of iron-based preparation compared with another iron preparation or other intervention (placebo, no treatment, or individual vitamin or mineral supplement). We will exclude all studies where iron preparation is unclear and cannot be classified. The studies will be grouped into those that recruited menstruating, pregnant or postpartum women, and the details of inclusion criteria for population and interventions are presented in Table 1.

**Table 1** Research question for menstruating, pregnant or postpartum populations.

| Group              | Components              | Description                                                                                                                                                                                                                                                                                                                                                                                                                                                                                           |
|--------------------|-------------------------|-------------------------------------------------------------------------------------------------------------------------------------------------------------------------------------------------------------------------------------------------------------------------------------------------------------------------------------------------------------------------------------------------------------------------------------------------------------------------------------------------------|
| Menstruating women | Population              | <ul style="list-style-type: none"> <li>Any women with diagnosed IDA not caused by a chronic condition</li> </ul>                                                                                                                                                                                                                                                                                                                                                                                      |
|                    | Intervention/Comparator | <ul style="list-style-type: none"> <li>Iron treatment in any format, regime and form of administration compared to other iron treatment, placebo, vitamin supplement or no treatment.</li> <li>We will also include studies with blood transfusion and erythropoietin</li> <li>Exclude studies where iron therapy is given concomitantly with treatments for heavy menstrual bleeding such as hormone treatments, contraception, the Mirena coil, and radiological and surgical treatments</li> </ul> |
| Pregnant           | Population              | <ul style="list-style-type: none"> <li>Women with at any stage of pregnancy with diagnosed IDA not caused by a chronic condition.</li> </ul>                                                                                                                                                                                                                                                                                                                                                          |
|                    | Intervention/Comparator | <ul style="list-style-type: none"> <li>Iron treatment in any format (a minimum of 60mg of elemental iron prescribed) (2), regime and form of administration compared to other iron treatment, placebo, vitamin supplement or no treatment.</li> <li>We will exclude studies evaluating erythropoietin, micronutrient or multivitamin supplements, or with blood transfusion as an intervention.</li> </ul>                                                                                            |
| Postpartum         | Population              | <ul style="list-style-type: none"> <li>The postpartum period up to 6 weeks after delivery. We assume that anaemia in the postpartum population is due to iron deficiency, unless otherwise stated in the study.</li> </ul>                                                                                                                                                                                                                                                                            |
|                    | Intervention/Comparator | <ul style="list-style-type: none"> <li>Iron treatment in any format, regime and form of administration compared to other iron treatment, placebo, vitamin supplement or no treatment.</li> </ul>                                                                                                                                                                                                                                                                                                      |

## 5. Data extraction and management

We will develop separate Data Extraction Forms (DEF) for all three populations. The DEF will be piloted on five to ten eligible studies. Two researchers will extract data from the included studies independently. Any discrepancies between their choices will be resolved by consensus with input from a third investigator.

### 5.1. Population characteristics

From all studies regardless of the subpopulation, we will collect following information about women's characteristics: age, ethnicity, baseline intake of iron (if available), baseline Hb and serum ferritin levels.

#### 5.1.1. For women of reproductive age

- i. Increased demand for iron (heavy menstrual bleeding, elite athletes, etc.)
- ii. Presence of relevant to iron metabolism co-morbidities

#### 5.1.2. For pregnant women

- i. Single or multiple gestation

- ii. Pre-existing haemoglobinopathies
- iii. Obstetric risk factors for haemorrhage

### **5.1.3. For postnatal women**

- i. Increased demand for iron (postpartum haemorrhage)
- ii. Women receiving donor blood transfusion
- iii. Presence of relevant to iron metabolism co-morbidities

For women receiving intravenous iron we will additionally collect information on baseline weight as intravenous iron dosages are calculated according to the participant's baseline Hb level and weight.

## **5.2. Outcome data**

For continuous outcomes, we will extract values and the measures of their variances as given by study authors at the end of the intervention (final values and mean changes from baseline).

For binary outcomes, we will extract number of events and number of participants in a given arm: a) as reported by the study authors for a given analysis; b) as number of participants randomised to a given intervention arm.

## **5.3. Risk of bias (quality) assessment**

The quality of RCTs will be assessed using the approach recommended by the Cochrane risk of bias (version 1.0). (3)

## **5.4. Data coding and storage**

All extracted data will be crosschecked and coded in a uniform way, as described below.

### **5.4.1. Iron-based interventions**

In the first instance, the treatments will be classified by the route of administration and their preparation (Figure 1). We anticipate variability in dose of elemental iron across the included studies. Furthermore, total dose of iron provided intravenously (IV) or intramuscularly (IM) is calculated according to starting Hb level and individual weight. We will, therefore, collect information on frequency, and total daily dose of elemental iron. From studies where iron was provided via IV/IM, we will collect information on women's baseline Hb level (average) and weight (average). The information will be cross tabulated and their comparability assessed across the studies. In case of extreme differences in the doses across the studies, we will explore their impact on the pooled effect in the pair-wise meta-analyses and report this as a limitation of our work.

### 5.4.2. Multiple iron-interventions

Studies with an arm where two types of iron preparations are both used will be treated as separate node (Figure 1).

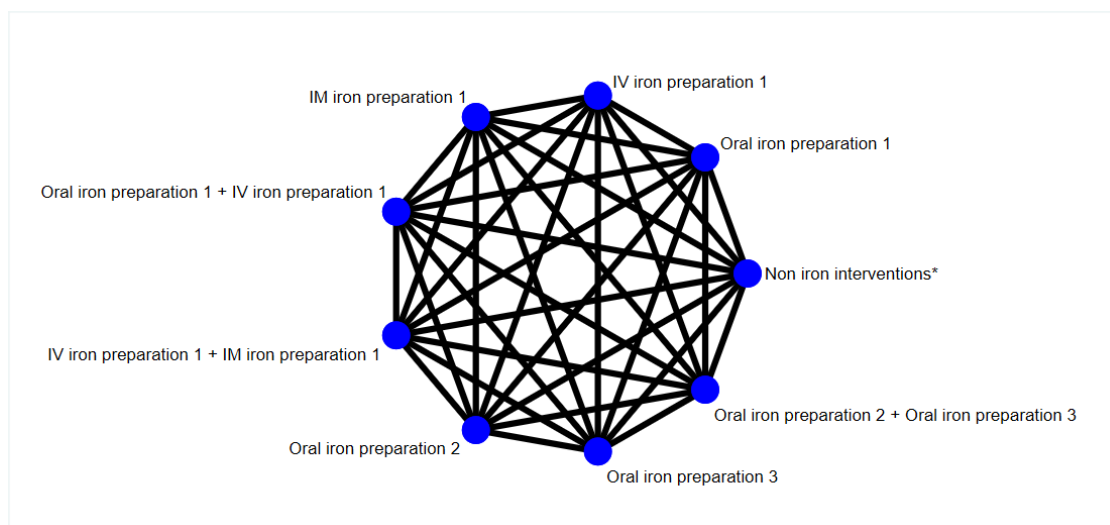

IV, intravenous; IM, intramuscular; \*placebo, no intervention, vitamins and/or minerals

Figure 1 Conceptual network of iron preparations used to treat iron deficient anaemia

### 5.4.3. Iron and concomitant interventions

In the first instance we will assume no substantial impact of concomitant, non-iron interventions (vitamins and/or minerals). This assumption will at a later stage be examined further in sensitivity analyses. In multiarm-design trials containing study arms of iron preparations with and without concomitant interventions (vitamin and/or mineral) we will combine data into one group (arm) (means and their variances, events and group size) using available and acceptable methods. (4) We will keep a record of any data transformations.

### 5.4.4. Non-iron arms

The arms containing placebo, no intervention, vitamins and/or minerals used as comparators will be all labelled as “non-iron treatments”. In multiarm-design trials where a separate placebo and vitamin and/or mineral were used we will combine data into one group (means and their variances, events and group size) using available and acceptable methods. (4) We will keep a record of any data transformations.

### 5.4.5. Adverse events

We will code adverse events as severe and non-severe following below principles:

- a) **Severe:** are those adverse reactions requiring hospital admission, significant morbidity and/or death.
- b) **Non-severe:** all other reported adverse reactions (e.g. diarrhoea, constipation, nausea and vomiting, etc.).

#### **5.4.6. Transformation of continuous outcome measures**

Data for continuous outcomes for which the measurement variance is reported as standard error will be recalculated to standard deviations using standard equation. (4) For studies where mean values are given without measurement variances, we will follow the approach proposed in the Cochrane Handbook (4). The values reported as median and interquartile ranges (IQR) will be extracted from the literature but not used in the meta-analysis. We will keep a record of any data transformations.

#### **5.4.7. Assumption of missingness for binary outcomes**

We will not make any assumptions regarding data missingness and all the analyses will be performed on available case-bases. Potential impact of missing outcome data will be addressed in sensitivity analysis for attrition bias.

### **6. Strategy for data synthesis**

Our main goal is to construct networks comparing all iron preparation reported in included trials in the three pre-defined populations: menstruating women, pregnant and postnatal women. In our work we will follow the best practice recommended for the frequentist approach to network meta-analysis. (5) All analyses will be performed using STATA 15.1 (StataCorp. 2017. Stata Statistical Software: Release 15. College Station, TX: StataCorp LLC). (6)

#### **6.1. Assessment of transitivity across treatment comparisons**

In each population, we will cross-tabulate and inspect baseline characteristics to evaluate the presence of clinical heterogeneity and validity of transitivity assumption. We will visually inspect the distribution of potential effect modifiers such as specified in section 5.1.

#### **6.2. Effect measures**

The default effect estimate for continuous measures, will be weighted mean difference (WMD), and for dichotomous odds ratio (OR). We will report both with a respective 95% confidence interval (CI). Our goal is to maximise the number of available for inclusion in the meta-analysis, therefore if any of the effectiveness outcomes (Hb or SF) will be reported as a dichotomous measure, we will assess the possibility of using recognised methods to convert the dichotomous effect measure (OR) to standardised mean difference (SMD). (7) If such a scenario occurs, the reported effect measure will be SMD. The effect estimate will be also presented as SMD if the scales, on which outcomes were measured, across the studies will vary.

#### **6.3. Pair-wise meta-analysis**

In the first instance, we will visually inspect the direction of the effect estimates in the direct evidence for each comparisons to assess the feasibility of their pooling in a meta-analysis. If there will be only a single trial reporting data for a given comparison, we will use a fixed effects model to estimate the

effect. Where two or more studies contribute the data, the default will be a random-effects model with restricted maximum likelihood. The statistical heterogeneity will be measured using  $I^2$  statistic and Tau. (8) For continuous outcomes we will report the number of studies that reported median and IQR, and could not be incorporated into the analysis.

### **6.3.1. Method for handling centre and cluster effects within each trial**

Cluster-randomised trials will be incorporated in the pair-wise analyses providing the Inter-Cluster Correlation coefficients are reported.

### **6.3.2. Adverse events**

In case of our initial approach to comparing safety profile will be deemed not feasible. We will perform a synthesis of adverse events (9) for the top three interventions identified in the network meta-analysis for the main outcome (Hb) and in the placebo (or no intervention) arms.

### **6.3.3. Dealing with timing-related issues**

Based on the findings of previous research (10-12), we anticipate challenges caused by varying outcome measurement time and treatment duration. We consulted a panel of clinical experts (obstetric haematologists) - independent from this work - to guide our decisions on this matter and ensure clinical relevance. Consequently, we decided what follows:

- i. We will collect on the gestational age at inclusion and record the timing of outcome measurement from baseline.
- ii. The analysis will be performed for the most frequently reported time point and its clinical relevance discussed with the clinical experts
- iii. Additionally, if possible, we will perform a sensitivity analysis using all available data in a multivariate network meta-analysis where the timing of a measurement will be incorporated as a covariate.

## **6.4. Network meta-analysis**

### **6.4.1. Setting up network**

For each combination of population and outcome, we will assess feasibility of performing network meta-analysis following subsequent steps:

- i. Evaluate the availability of data for each comparison in a pair-wise meta-analysis and distribution of relevant baseline and study-level characteristics
- ii. Generate and inspect geometry of the network for its connectivity



The node with the **not-active interventions** (e.g. placebo) will be set as a reference treatment. If the effect estimates across the studies in the pair-wise meta-analysis will be highly heterogenous (substantial heterogeneity as per Cochrane definition) or network poorly connected, we will refrain from performing network meta-analysis and report only the findings of the pair-wise meta-analysis.

#### **6.4.2. Network meta-analysis**

The network meta-analysis will be performed using a multivariate methods following frequentist approach as implemented in network routine in Stata (13, 14) fitting a treatment contrast model with assumption of a common heterogeneity for all comparisons.

We assume that within all three populations (menstruating, pregnant and postpartum women), any woman from the included trials could be equally likely randomised to any other iron treatment.

Hence, in the first instance the network meta-analysis will fitted under assumption of consistency. (13)

##### *Testing for consistency*

Consistency between direct and indirect sources of evidence will be statistically assessed locally (i.e. for all the closed loops in the network) and globally. The local consistency will be assessed by side-splitting approach (15-17), and the global using design-by-treatment interaction model. (18) If the consistency factors denote its lack, the distribution of effect modifiers within the loop will be explored. At any stage of the network meta-analysis, the transitivity assumptions will be evaluated conceptually for all indirect comparisons to derive valid network meta-analysis estimates.

#### **6.4.3. Ranking treatments**

The relative ranking of treatments will be presented in the form of the surface under the cumulative ranking (SUCRA) probabilities for the treatment achieving the highest value of the outcome measure for the effectiveness data, and the lowest value for the adverse events. We will also generate a mean rank for each intervention.

#### **6.4.4. Presentation of the findings**

For each model we will generate:

- a) Graph with network map
- b) Overview of pair comparisons by direct, indirect and mixed (network) evidence.
- c) Contribution matrix (study by intervention) showing borrowing of strength from individual studies for each intervention
- d) Overview of treatment effects for all interventions in comparison to a common comparator (no iron)
- e) Ranking of interventions, mean rank and SUCRA

All information will be collated in the summary of findings tables for network meta-analysis.

## **6.5. Sensitivity analyses**

### **6.5.1. Secondary models**

As a secondary approach we will rank interventions using alternative way of grouping interventions base on a) rout of iron administration (any oral, any IV, any IM); and b) iron salt type combined with route of administration (ferric salts, ferrous salts, lactoferrin).

We will also attempt to apply a multivariate model using all available data and including time of outcome measurement as a covariate.

### **6.5.2. Subgroup comparison**

For the pregnant population we plan a subgroup analyses for the main outcome by country income status according to the World Bank classification (low and middle-income vs high income).

### **6.5.3. Sensitivity analyses**

We will explore the impact of the following factors:

#### *Study quality*

We will use CINeMA software (19, 20) to evaluate the confidence in the findings from the main network meta-analysis for Hb levels evaluated around 4 weeks from baseline measure, and interventions treated as individual preparations.

#### *Publication date*

We will limit the studies in the main analysis only to those published after year 2000.

#### *Concomitant minerals & vitamins*

We will remove arms and studies included in the main analysis were the iron treatment was provided with minerals and/or vitamins such as folic acid, vitamin C, or vitamin B.

## References

1. Hutton B, Salanti G, Caldwell DM, Chaimani A, Schmid CH, Cameron C, et al. The PRISMA extension statement for reporting of systematic reviews incorporating network meta-analyses of health care interventions: checklist and explanations. *Ann Intern Med.* 2015;162(11):777-84.
2. WHO. WHO recommendations on antenatal care for a positive pregnancy experience. Geneva: WHO Library; 2016.
3. Higgins JPTA, D.G. . Chapter 8: Assessing risk of bias in included studies. In: Higgins JPT GS, editor. *Cochrane Handbook for Systematic Reviews of Interventions*. Chichester (UK): John Wiley & Sons; 2008.
4. CochraneCollaboration. *Cochrane handbook for systematic reviews of interventions*. Oxford (UK): Wiley-Blackwell; 2008. Available from: Table of contents only <http://www.loc.gov/catdir/toc/ecip0819/2008022132.html>.
5. Caldwell DM. An overview of conducting systematic reviews with network meta-analysis. *Syst Rev.* 2014;3:109.
6. Shim S, Yoon BH, Shin IS, Bae JM. Network meta-analysis: application and practice using Stata. *Epidemiol Health.* 2017;39:e2017047.
7. Chinn S. A simple method for converting an odds ratio to effect size for use in meta-analysis. *Statist Med.* 2000;19:3127–31.
8. Higgins JP, Thompson SG. Quantifying heterogeneity in a meta-analysis. *Stat Med.* 2002;21(11):1539-58.
9. Nyaga VN, Arbyn M, Aerts M. Metaprop: a Stata command to perform meta-analysis of binomial data. *Archives of Public Health.* 2014;72:39-49.
10. Malinowski AK, D'Souza R, Khan KS, Shehata N, Malinowski M, Daru J. Reported Outcomes in Perinatal Iron Deficiency Anemia Trials: A Systematic Review. *Gynecol Obstet Invest.* 2019:1-18.
11. Pena-Rosas JP, De-Regil LM, Garcia-Casal MN, Dowswell T. Daily oral iron supplementation during pregnancy. *Cochrane Database Syst Rev.* 2015(7):CD004736.
12. Reveiz L, Gyte GM, Cuervo LG, Casasbuenas A. Treatments for iron-deficiency anaemia in pregnancy. *Cochrane Database Syst Rev.* 2011(10):CD003094.
13. White IR. Network meta-analysis. *Stata J* 2015;358:951-85.
14. White IR, Barrett JK, Jackson D, Higgins JP. Consistency and inconsistency in network meta-analysis: model estimation using multivariate meta-regression. *Research synthesis methods.* 2012;3(2):111-25.
15. Caldwell DM, Welton NJ, Ades AE. Mixed treatment comparison analysis provides internally coherent treatment effect estimates based on overviews of reviews and can reveal inconsistency. *Journal of clinical epidemiology.* 2010;63(8):875-82.
16. Salanti G, Higgins JP, Ades AE, Ioannidis JP. Evaluation of networks of randomized trials. *Stat Methods Med Res.* 2008;17(3):279-301.
17. Dias S, Welton NJ, Caldwell DM, Ades AE. Checking consistency in mixed treatment comparison meta-analysis. *Statistics in medicine.* 2010;29(7-8):932-44.
18. Efthimiou O, Debray TP, van Valkenhoef G, Trelle S, Panayidou K, Moons KG, et al. GetReal in network meta-analysis: a review of the methodology. *Research synthesis methods.* 2016;7(3):236-63.
19. CINeMA: Confidence in Network Meta-Analysis Switzerland: University of Bern, Institute of Social and Preventive Medicine; 2017 [Available from: [cinema.ispm.unibe.ch](http://cinema.ispm.unibe.ch)].
20. Salanti G, Del Giovane C, Chaimani A, Caldwell DM, Higgins JP. Evaluating the quality of evidence from a network meta-analysis. *PLoS One.* 2014;9(7):e99682.

## **Appendix 2** Details of the methods

### *Eligibility criteria*

We excluded trials:

- comparing different dosage regimens of the same iron preparation e.g. ferrous sulphate 200 mg of elemental iron versus 400 mg of elemental iron (excluded as we compared different types of iron preparations not the amount of elemental iron they contained);
- with erythropoietin or blood transfusion;
- with micronutrient or multivitamin supplements were evaluated as treatment option; however, we allowed trials where individual vitamins such as folic acid, vitamin B12, B2, C or zinc were given alongside iron preparation;
- study arms included vitamin A;
- studies with outdated iron preparations.

### *Study identification*

#### **Databases searched in Cochrane reviews**

1. Revirez et al. 2011 (1)

The Cochrane Pregnancy and Childbirth Group's Trials Register (7 June 2011), CENTRAL (2011, Issue 5), PubMed (1966 to June 2011), the International Clinical Trials Registry Platform (ICTRP) (2 May 2011), Health Technology Assessment Program (HTA) (2 May 2011) and LATINREC (Colombia) (2 May 2011).

2. Peña-Rosas et al. 2015 (2)

The Cochrane Pregnancy and Childbirth Group's Trials Register (10 January 2015), the WHO International Clinical Trials Registry Platform (ICTRP) (26 February 2015)

#### **Databases searched for period 2011 to July 2018, and then 2018 to February 2021**

- Medline (via Ovid),
- Embase,
- Scopus,
- Web of Science
- Scientific Electronic Library Online (this database was not searched between 2018 and February 2021 due to access issues)

Clinical Trial registers searched for period 2011 to July 2018

- Clinical Trials Gov (also searched between 2018 and February 2021)
- Australian New Zealand Clinical Trials Registry,

- European Union Clinical Trial Register,
- International Standard Randomised Controlled Trial Number registry

### *Data collection*

We extracted data on age, intake of iron, baseline haemoglobin and serum ferritin levels, gestation (single or multiple), gestational age at inclusion, presence of pre-existing haemoglobinopathies, and obstetric risk factors for haemorrhage. We also recorded whether the trials were conducted in areas where parasitic infections are endemic. For trials administering iron intravenous or intramuscularly, we additionally collected data on women's weight as this is required to calculate the total dose of iron. (3,4) For treatment characteristics we collected information on type of iron preparation, route of administration, details of their administration (e.g. how many tablets per day were taken), and the total daily dose of elemental iron (mg).

### *Additional Analyses*

As a secondary approach, the interventions were grouped by:

- **route of administration:** oral, intravenous, intramuscular with lactoferrin, iron amino acid chelate and arms with “no iron preparation” kept separately. Lactoferrin was kept as a separate oral intervention, being a protein from the transferrin family, increasing the uptake of available iron, not a type of iron salt. (5) While iron amino acid chelate is a separate type of oral iron designed to pass through the GI tract without being altered. (6)
- **route of administration and type of iron salt:** oral ferric or oral ferrous salt, intravenous ferric, intramuscular ferric salt. Lactoferrin, iron amino acid chelate and arms with “no iron preparation” kept separately.

In the analyses with a secondary approach to grouping of iron preparations, we used “non-iron intervention” as the reference arm. As in the secondary approach due to broad grouping of preparations it was not possible to use ferrous sulphate (oral ferrous salt) as a reference.

### **References**

1. Reveiz L, Gyte GM, Cuervo LG, et al. Treatments for iron-deficiency anaemia in pregnancy. *Cochrane Database of Systematic Reviews* 2011; (10).
2. Peña-Rosas JP, De-Regil LM, Garcia-Casal MN, et al. Daily oral iron supplementation during pregnancy. *Cochrane Database of Systematic Reviews* 2015; (7).
3. Ganzoni A. Intravenous iron-dextran: therapeutic and experimental possibilities. *Schweizerische Medizinische Wochenschrift* 1970; **100**(7): 301.

4. Dignass AU, Gasche C, Bettenworth D, et al. European Crohn's and Colitis Organisation [ECCO]. *European consensus on the diagnosis and management of iron deficiency and anaemia in inflammatory bowel diseases J Crohns Colitis* 2015; **9**(3): 211-22.
5. Rosa L, Cutone A, Lepanto MS, et al. *Lactoferrin: a natural glycoprotein involved in iron and inflammatory homeostasis. International journal of molecular sciences.* 2017 Sep;**18**(9):1985.
6. Hertrampf, E. and Olivares, M., 2004. *Iron amino acid chelates. International journal for vitamin and nutrition research.*; **74**(6), pp.435-443.

Accepted version

## Appendix 3 Search strategy

### Medline via Ovid

| Item      | Term                                                                                                 |
|-----------|------------------------------------------------------------------------------------------------------|
| 1         | Pregnancy/                                                                                           |
| 2         | pregnan*.af.                                                                                         |
| 3         | Gravidity/                                                                                           |
| 4         | gravid*.af.                                                                                          |
| 5         | gestation*.af.                                                                                       |
| 6         | Pregnant Women/                                                                                      |
| 7         | pregnant wom#n.af.                                                                                   |
| 8         | (child adj3 bearing).af.                                                                             |
| 9         | childbearing.af.                                                                                     |
| 10        | matern*.af.                                                                                          |
| 11        | antepartum.ab,ti.                                                                                    |
| 12        | antenatal.ab,ti.                                                                                     |
| <b>13</b> | <b>OR/1-12</b>                                                                                       |
| <b>14</b> | <b>exp Iron Deficiency Anemia/</b>                                                                   |
| 15        | Hypochromic.af.                                                                                      |
| 16        | (iron deficien* OR iron-deficien*).af.                                                               |
| 17        | microcytic.af.                                                                                       |
| 18        | Sideropenic.af.                                                                                      |
| 19        | Sideroblastic.af.                                                                                    |
| <b>20</b> | <b>OR/15-19</b>                                                                                      |
| 21        | (anaemia OR anemia).af.                                                                              |
| 22        | 20 adj 21                                                                                            |
| 23        | Ferritin/                                                                                            |
| 24        | (Ferriprive OR ferritin* OR isoferritin*).af.                                                        |
| <b>25</b> | <b>14 OR 20 OR 22 OR 23 OR 24</b>                                                                    |
| 26        | exp Randomized Controlled Trial/                                                                     |
| 27        | randomized controlled trial.pt.                                                                      |
| 28        | controlled clinical trial.pt.                                                                        |
| 29        | randomized.ab.                                                                                       |
| 30        | placebo.ab.                                                                                          |
| 31        | clinical trials as topic.sh.                                                                         |
| 32        | randomly.ab.                                                                                         |
| 33        | clinical trials as topic.sh.                                                                         |
| 34        | trial.ti.                                                                                            |
| <b>35</b> | <b>OR/26-34</b>                                                                                      |
| <b>36</b> | <b>13 AND 25 AND 35</b>                                                                              |
| 37        | exp Animals/                                                                                         |
| 38        | (rat\$ or mouse or mice or hamster\$ or animal\$ or dog\$ or cat\$ or bovine or sheep or lamb\$).af. |
| <b>39</b> | <b>37 OR 38</b>                                                                                      |
| 40        | Humans/                                                                                              |
| 41        | human\$.tw,ot,kf.                                                                                    |
| <b>42</b> | <b>40 OR 41</b>                                                                                      |
| <b>43</b> | <b>39 NOT (39 and 42)</b>                                                                            |
| <b>44</b> | <b>36 NOT 43</b>                                                                                     |

## Appendix 4 Characteristics of included studies and iron preparations

### 1. Characteristics of included studies

#### a) Data from studies contributing to the network meta-analysis for haemoglobin (n=30)

| Study ID                         | Country name | Comparisons                | Haemoglobin level (g/L) | Weight (kg) | Gestational age at inclusion (trimester) | Pre-existing health problems | Sample size |
|----------------------------------|--------------|----------------------------|-------------------------|-------------|------------------------------------------|------------------------------|-------------|
| <b>Pregnancy Type: Singleton</b> |              |                            |                         |             |                                          |                              |             |
| Arzoo 2020                       | Bangladesh   | Ferrous sulphate           | 79.7                    | NR          | Second to Third                          | no                           | 150         |
|                                  |              | Iron sucrose (IV)          | 79.6                    |             |                                          |                              |             |
| Bayoumeu 2002                    | France       | Ferrous sulphate           | 97                      | 53          | Second                                   | no                           | 50          |
|                                  |              | Iron sucrose (IV)          | 96                      | 55          |                                          |                              |             |
| Bhavi 2017*                      | India        | Ferrous fumarate           | 91                      | NR          | NR                                       | no                           | 200         |
|                                  |              | Iron sucrose (IV)          | 89                      |             |                                          |                              |             |
|                                  |              | No intervention / Placebo  | 126                     |             |                                          |                              |             |
| Breyman 2016                     | Switzerland  | Ferrous sulphate           | 99                      | 57.4        | Second to Third                          | no                           | 247         |
|                                  |              | Ferric carboxymaltose (IV) | 98                      | 59.3        |                                          |                              |             |
| Dalal 2018*                      | India        | Ferrous sulphate           | 84.2                    | NR          | Third                                    | no                           | 150         |
|                                  |              | Iron sucrose (IV)          | 84                      |             |                                          |                              |             |
| Deeba 2012*                      | India        | Iron ferrous ascorbate     | 79                      | NR          | Third                                    | no                           | 200         |
|                                  |              | Iron sucrose (IV)          | 79                      |             |                                          |                              |             |
| Digumarthi 2008*                 | India        | Ferrous fumarate           | 81                      | NR          | NR                                       | no                           | 30          |
|                                  |              | Iron sucrose (IV)          | 81                      |             |                                          |                              |             |



| Study ID       | Country name | Comparisons                    | Haemoglobin level (g/L) | Weight (kg) | Gestational age at inclusion (trimester) | Pre-existing health problems | Sample size |
|----------------|--------------|--------------------------------|-------------------------|-------------|------------------------------------------|------------------------------|-------------|
| Gupta 2014*    | India        | Ferrous sulphate               | 79                      | NR          | Third                                    | no                           | 100         |
|                |              | Iron sucrose (IV)              | 78                      |             |                                          |                              |             |
| Nanthini 2017  | India        | Iron sorbitol citric acid (IM) | 80                      | 56          | Second                                   | no                           | 127         |
|                |              | Iron sucrose (IV)              | 80                      | 56          |                                          |                              |             |
| Nappi 2009     | Italy        | Lactoferrin                    | 101                     | NR          | NR                                       | no                           | 100         |
|                |              | Ferrous sulphate               | 101                     |             |                                          |                              |             |
| NCT00746551    | Thailand     | Ferrous fumarate               | NR                      | 50.2        | Third                                    | NR                           | 80          |
|                |              | Iron sucrose (IV)              | NT                      | 48.1        |                                          |                              |             |
| Neeru 2012     | India        | Ferrous fumarate               | 98                      | NR          | Second                                   | unclear                      | 100         |
|                |              | Iron sucrose (IV)              | 92                      |             |                                          |                              |             |
| Rajwani 2020   | India        | Iron sucrose (IV)              | 78.9                    | NR          | Second to Third                          | unclear                      | 160         |
|                |              | Ferric carboxymaltose (IV)     | 78                      |             |                                          |                              |             |
| Rezk 2016      | Egypt        | Lactoferrin                    | 80                      | NR          | Second                                   | no                           | 200         |
|                |              | Ferrous sulphate               | 82                      |             |                                          |                              |             |
| Tariq 2015     | Pakistan     | Iron dextran (IV)              | 87                      | NR          | Second to Third                          | no                           | 180         |
|                |              | Iron sucrose (IV)              | 90                      |             |                                          |                              |             |
| Santiago 2020* | Philippines  | Iron sucrose (IV)              | 99.7                    | NR          | Second                                   | no                           | 48          |
|                |              | Iron amino acid chelate        | 101.2                   |             |                                          |                              |             |

| Study ID                     | Country name         | Comparisons                    | Haemoglobin level (g/L) | Weight (kg) | Gestational age at inclusion (trimester) | Pre-existing health problems | Sample size |
|------------------------------|----------------------|--------------------------------|-------------------------|-------------|------------------------------------------|------------------------------|-------------|
| <b>Pregnancy Type: Mixed</b> |                      |                                |                         |             |                                          |                              |             |
| Abhilashini 2014             | India                | Ferrous sulphate               | 72                      | 50          | Third                                    | no                           | 100         |
|                              |                      | Iron sucrose (IV)              | 69                      | 56          |                                          |                              |             |
| Aggarwal 2021*               | India                | Ferrous sulphate               | 60                      | 55.9        | Third                                    | unclear                      | 50          |
|                              |                      | Iron sucrose (IV)              | 63                      | 54.5        |                                          |                              |             |
| Dhanani 2012*                | India                | Iron sorbitol citric acid (IM) | 83                      | 46          | Second                                   | no                           | 60          |
|                              |                      | Iron sucrose (IV)              | 76                      | 46          |                                          |                              |             |
| Fochi 1985                   | Italy                | Ferrous sulphate               | 110                     | NR          | Second                                   | no                           | 69          |
|                              |                      | Iron chondroitinsulfuric acid  | 106                     |             |                                          |                              |             |
| Gawai 2020                   | India                | Lactoferrin                    | 90.3                    | NR          | Second to Third                          | unclear                      | 100         |
|                              |                      | Ferrous sulphate               | 91.3                    |             |                                          |                              |             |
| Jose 2019                    | India                | Iron sucrose (IV)              | 87                      | 57          | Third                                    | no                           | 100         |
|                              |                      | Ferric carboxymaltose (IV)     | 86                      | 57          |                                          |                              |             |
| Kamdi 2015*                  | India                | Iron ferrous ascorbate         | 83                      | 44.4        | NR                                       | unclear                      | 73          |
|                              |                      | Ferrous asparto glycinate      | 84                      | 44.5        |                                          |                              |             |
| Kochhar 2013*                | India                | Ferrous sulphate               | 76                      | 51          | Second to Third                          | Infectious diseases (other)  | 100         |
|                              |                      | Iron sucrose (IV)              | 77                      | 53          |                                          |                              |             |
| Ortiz 2011                   | Columbia & Argentina | Ferrous sulphate               | 99                      | NR          | Second                                   | unclear                      | 80          |
|                              |                      | Iron polymaltose complex       | 96                      |             |                                          |                              |             |

| Study ID       | Country name | Comparisons                    | Haemoglobin level (g/L) | Weight (kg) | Gestational age at inclusion (trimester) | Pre-existing health problems | Sample size |
|----------------|--------------|--------------------------------|-------------------------|-------------|------------------------------------------|------------------------------|-------------|
| Paesano 2010*  | Italy        | Lactoferrin                    | 100                     | NR          | NR                                       | no                           | 75          |
|                |              | Ferrous sulphate               | 100                     |             |                                          |                              |             |
| Rudra 2016*m   | India        | Ferrous ascorbate              | 79                      | NR          | Third                                    | unclear                      | 200         |
|                |              | Iron sucrose (IV)              | 78                      |             |                                          |                              |             |
| Sagaonkar 2009 | India        | Ferrous fumarate               | 85                      | 43          | Second                                   | unclear                      | 150         |
|                |              | Carbonyl iron                  | 84                      | 43          |                                          |                              |             |
| Singh 2012     | India        | Iron sorbitol citric acid (IM) | 68                      | NR          | Second                                   | unclear                      | 100         |
|                |              | Iron sucrose (IV)              | 65                      |             |                                          |                              |             |
| Symonds 1969   | Australia    | Ferrous sulphate               | 101                     | NR          | NR                                       | unclear                      | 100         |
|                |              | Iron Ferrous Gluconate         | 101                     |             |                                          |                              |             |
|                |              | Iron dextran (IV)              | 103                     |             |                                          |                              |             |
|                |              | No intervention / Placebo      | 103                     |             |                                          |                              |             |

IV, intravenous; IM, intramuscular

\*contributing data to the network meta-analysis for serum ferritin

**b) Data not contributing to the network meta-analysis for haemoglobin (n=23)**

| Study ID                         | Country name | Comparisons                                        | Haemoglobin level (g/L) | Weight (kg) | Gestational age at inclusion (trimester) | Pre-existing health problems | Sample size |
|----------------------------------|--------------|----------------------------------------------------|-------------------------|-------------|------------------------------------------|------------------------------|-------------|
| <b>Pregnancy Type: Singleton</b> |              |                                                    |                         |             |                                          |                              |             |
| Al 2005*                         | Turkey       | Iron polymaltose complex                           | 98                      | 58          | Third                                    | no                           | 90          |
|                                  |              | Iron sucrose (IV)                                  | 99                      | 56          |                                          |                              |             |
| Hayat 2019                       | India        | Iron dextran (IM)                                  | 87                      | NR          | First                                    | no                           | 198         |
|                                  |              | Iron sucrose (IV)                                  | 90                      |             |                                          |                              |             |
| Khalafallah 2010                 | Australia    | Ferrous sulphate                                   | 107                     | 75          | Second                                   | no                           | 200         |
|                                  |              | Iron polymaltose (IV) followed by Ferrous sulphate | 109                     | 73          |                                          |                              |             |
| Komolafe 2003                    | Nigeria      | Ferrous sulphate                                   | NR                      | NR          | Second                                   | infectious diseases (other)  | 60          |
|                                  |              | Iron dextran (IM)                                  |                         |             |                                          |                              |             |
| Kumar 2005                       | India        | Ferrous sulphate                                   | 99                      | NR          | Second                                   | infectious diseases (other)  | 220         |
|                                  |              | Iron sorbitol citric acid (IM)                     | 96                      |             |                                          |                              |             |
| Sharma 2004                      | India        | Ferrous sulphate                                   | 96                      | NR          | Second                                   | infectious diseases (other)  | 254         |
|                                  |              | Iron dextran (IM)                                  | 94                      |             |                                          |                              |             |
| Van Eijk 1978                    | Netherlands  | Ferrous sulphate                                   | 82                      | NR          | First                                    | no                           | 30          |
|                                  |              | No intervention / Placebo                          | 82                      |             |                                          |                              |             |

| Study ID                     | Country name | Comparisons              | Haemoglobin level (g/L) | Weight (kg) | Gestational age at inclusion (trimester) | Pre-existing health problems | Sample size |
|------------------------------|--------------|--------------------------|-------------------------|-------------|------------------------------------------|------------------------------|-------------|
| <b>Pregnancy Type: Mixed</b> |              |                          |                         |             |                                          |                              |             |
| Al Momen 1996                | Saudi Arabia | Iron polymaltose complex | 98                      | 58          | Third                                    | no                           | 100         |
|                              |              | Iron sucrose (IV)        | 99                      | 56          |                                          |                              |             |
| Borg 2020                    | India        | Lactoferrin              | NR                      | NR          | NR                                       | unclear                      | 98          |
|                              |              | Ferrous sulphate         |                         |             |                                          |                              |             |
| Darwish 2017                 | Egypt        | Ferrous fumarate         | 82                      | NR          | Second                                   | no                           | 66          |
|                              |              | Iron dextran (IV)        | 56                      |             |                                          |                              |             |
| Darwish 2018                 | Egypt        | Lactoferrin              | 86                      | NR          | Second                                   | no                           | 120         |
|                              |              | Iron dextran (IV)        | 82                      |             |                                          |                              |             |
| Han 2011                     | China        | Ferrous sulphate         | 100                     | NR          | Second                                   | unclear                      | 153         |
|                              |              | NaFeEDTA                 | 100                     |             |                                          |                              |             |
|                              |              | Placebo                  | 102                     |             |                                          |                              |             |
| Ma 2010                      | China        | Ferrous sulphate         | 99                      | NR          | Second                                   | unclear                      | 164         |
|                              |              | Placebo                  | 102                     |             |                                          |                              |             |
| Mehta 2014                   | India        | Ferrous fumarate         | 67                      | NR          | Second to Third                          | no                           | 150         |
|                              |              | Iron sucrose (IV)        | 67                      |             |                                          |                              |             |
| Menendez 1994                | Gambia       | Ferrous sulphate         | 100                     | 55          | Second                                   | Yes (heamoglobino pathies)   | 500         |
|                              |              | Placebo                  | 101                     | 55          |                                          |                              |             |
| Preziosi 1997                | Nigeria      | Ferrous betainate        | NR                      | NR          | Third                                    | NR                           | 197         |
|                              |              | Placebo                  |                         |             |                                          |                              |             |

| Study ID          | Country name | Comparisons              | Haemoglobin level (g/L) | Weight (kg) | Gestational age at inclusion (trimester) | Pre-existing health problems | Sample size |
|-------------------|--------------|--------------------------|-------------------------|-------------|------------------------------------------|------------------------------|-------------|
| Samsudin 2020     | Malaysia     | Iron sucrose (IV)        | 84                      | 55.8        | Second to Third                          | no                           | 40          |
|                   |              | Iron dextran (IV)        | 86                      | 62.8        |                                          |                              |             |
| Simmons 1993      | Jamaica      | Ferrous sulphate         | 101                     | 62          | Second                                   | unclear                      | 376         |
|                   |              | No intervention          | 99                      | 60          |                                          |                              |             |
| Singh 1998        | Singapore    | Ferrous fumarate         | 86                      | NR          | NR                                       | unclear                      | 100         |
|                   |              | Iron polymaltose complex | 81                      |             |                                          |                              |             |
| Suharno 1993      | Indonesia    | Ferrous sulphate         | 103                     | 50          | Second                                   | unclear                      | 305         |
|                   |              | Placebo                  | 103                     | 49          |                                          |                              |             |
| Sun 2010          | China        | Ferrous sulphate         | 100                     | NR          | Second                                   | unclear                      | 186         |
|                   |              | Placebo                  | 101                     |             |                                          |                              |             |
| Tanumihardjo 2002 | Indonesia    | Ferrous sulphate         | 112                     | 46.8        | Second                                   | unclear                      | 27          |
|                   |              | Placebo                  | 113                     | 46.8        |                                          |                              |             |

IV, intravenous; IM, intramuscular; NR, not reported

\*contributing data to the network meta-analysis for serum ferritin

## 2. Characteristics of iron preparations in the included studies

### a) Data from studies contributing to the network meta-analysis for haemoglobin (n=30)

| Intervention                           | Study ID        | Preparation dose (mg) | Frequency | Total daily dose (mg) | Concomitant                   | Treatment duration (weeks) |
|----------------------------------------|-----------------|-----------------------|-----------|-----------------------|-------------------------------|----------------------------|
| <b>Oral iron preparations</b>          |                 |                       |           |                       |                               |                            |
| <b>Ferrous asparto glycinate</b>       | Kamdi 2015      | 100 e.                | 1xday     | 100 e.                | Folic acid                    | 4                          |
| <b>Carbonyl iron</b>                   | Sagaonkar 2009  | NR                    | 1xday     | 100 e.                | Folic acid, vitamin B12, zinc | 12                         |
| <b>Iron amino acid chelate</b>         | Santiago 2019   | 30 e.                 | 2xday     | 60 e.                 | NR                            | 12                         |
| <b>Iron chondroitin-sulphuric acid</b> | Fochi 1985      | NR                    | 3xday     | 90 e.                 | NR                            | 7.1 (50 days)              |
| <b>Iron polymaltose complex</b>        | Ortiz 2011      | 100 e.                | 2xday     | 200 e.                | NR                            | 12.9                       |
| <b>Ferrous ascorbate</b>               | Deeba 2012      | 100 e.                | 2xday     | 200 e.                | Folic acid                    | 8                          |
|                                        | Kamdi 2015      | 100 e.                | 1xday     | 100 e.                | Folic acid                    | 4                          |
|                                        | Rudra 2016      | 100 e.                | 2xday     | 200 e.                | Folic acid                    | 12                         |
| <b>Ferrous fumarate</b>                | Bhavi 2017      | 100 e.                | 2xday     | 200 e.                | Folic acid                    | 4                          |
|                                        | Digumarthi 2008 | 300                   | 2xday     | 100 e.                | Folic acid                    | NR                         |
|                                        | Nerru 2012      | 300                   | NR        | 100 e.                | NR                            | NR                         |
|                                        | NCT00746551     | NR                    | 3xday     | 200 e.                | Folic acid                    | 3                          |
|                                        | Sagaonkar 2009  | 152                   | 2xday     | 100 e.                | Folic acid, zinc              | 12                         |
| <b>Ferrous gluconate</b>               | Symonds 1969    | NR                    | 3xday     | 108 e.                | NR                            | min. 8                     |

| <b>Intervention</b>     | <b>Study ID</b>  | <b>Preparation dose (mg)</b> | <b>Frequency</b> | <b>Total daily dose (mg)</b> | <b>Concomitant</b> | <b>Treatment duration (weeks)</b> |
|-------------------------|------------------|------------------------------|------------------|------------------------------|--------------------|-----------------------------------|
| <b>Ferrous sulphate</b> | Abhilashini 2014 | 200                          | 3xday            | 180 e.                       | NR                 | ~ 8                               |
|                         | Aggarwal 2012    | 200                          | 3xday            | 180 e.                       | NR                 | 4                                 |
|                         | Arzoo 2020       | 200                          | 3xday            | 180 e.                       | NR                 | 9                                 |
|                         | Bayoumeu 2002    | 80                           | 3xday            | 240 e.                       | Folic acid         | 4                                 |
|                         | Breymann 2016    | 100                          | 2xday            | 200 e.                       | NR                 | 12                                |
|                         | Dalal 2018       | 100 e.                       | 2xday            | 200 e.                       | Albendazole        | NR                                |
|                         | Fochi 1985       | NR                           | 1xday            | 105 e.                       | NR                 | 7.1 (50 days)                     |
|                         | Gawai 2020       | 200                          | 2xday            | 120 e.                       | NR                 | 8                                 |
|                         | Gupta 2014       | 200                          | 3xday            | 180 e.                       | NR                 | 4                                 |
|                         | Kochhar 2013     | 200                          | 3xday            | 180 e.                       | NR                 | 4                                 |
|                         | Nappi 2009       | 520                          | 1xday            | 100 e.                       | Folic acid         | 4                                 |
|                         | Ortiz 2011       | 100                          | 2xday            | 100 e.                       | NR                 | 12.9                              |
|                         | Paesano 2010     | 520                          | 1xday            | 100 e.                       | NR                 | 4.3 (30 days)                     |
|                         | Rezk 2016        | 150                          | 1xday            | NR                           | Folic acid         | 8                                 |
|                         | Santiago 2019    | 65 e.                        | 2xday            | 130 e.                       | NR                 | 12                                |
| Symonds 1969*           | 525              | 1xday                        | 105 e.           | NR                           | min. 8             |                                   |



| Intervention               | Study ID         | Preparation dose (mg) | Frequency                                            | Total daily dose (mg)   | Concomitant             | Treatment duration (weeks) |
|----------------------------|------------------|-----------------------|------------------------------------------------------|-------------------------|-------------------------|----------------------------|
| <b>IV iron preparation</b> |                  |                       |                                                      |                         |                         |                            |
| <b>Iron dextran</b>        | Symonds 1969**   | 20 of iron /ml        | 5 infusions                                          | 100 of iron             | NR                      | NR                         |
|                            | Tariq 2015 (LMW) | NR                    | Single injection                                     | Target set individually | NR                      | One day                    |
| <b>Iron sucrose</b>        | Abhilashini 2014 | 200                   | alternate days                                       | Target set individually | NR                      | Until target reached       |
|                            | Aggarwal 2012    | 200                   | 6 infusions, alternate days                          | Target set individually | Folic acid              | 10 days                    |
|                            | Arzoo 2020       | 200                   | alternate day                                        | Target set individually | NR                      | Unclear                    |
|                            | Bayoumeu 2002    | max of 200            | 6 infusions, alternate days                          | Target set individually | Folic acid              | 3                          |
|                            | Bhavi 2017       | 200 e.                | 1xday                                                | Target set individually | Folic acid              | Until target reached       |
|                            | Dalal 2018       | 200 e.                | Consecutive days until dose achieved before delivery | Target set individually | Albendazole             | Until target reached       |
|                            | Deeba 2012       | 200 e.                | NR                                                   | Target set individually | NR                      | Until target reached       |
|                            | Dhanani 2012     | 100 e.                | Single infusion                                      | 200 e.                  | NR                      | One day                    |
|                            | Digumarthi 2008  | NR                    | NR                                                   | Target set individually | NR                      | Until target reached       |
|                            | Gupta 2014       | 200                   | Alternate days                                       | Target set individually | NR                      | Until target reached       |
|                            | Jose 2019        | 300                   | 2xweek                                               | max of 600 / week       | Mebendazole, folic acid | 2                          |
|                            | Kochhar 2013     | 100                   | Alternate days                                       | Target set individually | NR                      | Until target reached       |
|                            | Nanthini 2017    | 100 e.                | Alternate days                                       | Target set individually | NR                      | NR                         |
| Neeru 2012***              | 200              | Alternate days        | Target set individually                              | NR                      | NR                      |                            |

| Intervention                     | Study ID      | Preparation dose (mg) | Frequency        | Total daily dose (mg)   | Concomitant             | Treatment duration (weeks) |
|----------------------------------|---------------|-----------------------|------------------|-------------------------|-------------------------|----------------------------|
| <b>Iron sucrose (cont.)</b>      | NCT00746551   | 200                   | 3 infusions      | max. of 500 / week      | NR                      | 3                          |
|                                  | Rajwani 2020  | 200                   | Alternate days   | Target set individually | NR                      | 4                          |
|                                  | Rudra 2016    | 200                   | Alternate days   | max. of 600 / week      | Folic acid              | 3                          |
|                                  | Singh 2012    | 150                   | Every 3 days     | Target set individually | NR                      | Until target reached       |
|                                  | Tariq 2015    | NR                    | Single infusion  | Target set individually | NR                      | One day                    |
| <b>Ferric carboxymaltose</b>     | Breymann 2016 | 1000 - 1500           | NR               | Target set individually | NR                      | 3                          |
|                                  | Rajwani 2020  | 1000                  | Single infusion? | Target set individually | NR                      | One day?                   |
|                                  | Jose 2019     | max. per sit<br>1000  | 3 infusions      | Target set individually | Mebendazole, folic acid | Until target reached       |
| <b>IM iron preparation</b>       |               |                       |                  |                         |                         |                            |
| <b>Iron sorbitol citric acid</b> | Dhanani 2012  | 75 e.                 | 4 injections     | 300 e.                  | NR                      | 4 days                     |
|                                  | Nanthini 2017 | 100                   | 1xday            | NR                      | NR                      | NR                         |
|                                  | Singh 2012    | 1.5 ml                | 1xday            | Target set individually | NR                      | Until target reached       |
| <b>Non-iron preparation</b>      |               |                       |                  |                         |                         |                            |
| <b>Lactoferrin</b>               | Gawai 2020    | 250                   | 2xday            | 500                     | NR                      | 8                          |
|                                  | Nappi 2009    | 100                   | 2xday            | 200                     | Folic acid              | 4                          |
|                                  | Paesano 2010  | 100                   | 2xday            | 200                     | NR                      | 4.3 (30 days)              |
|                                  | Rezk 2016     | 250                   | 1xday            | 250                     | NR                      | 8                          |
| <b>No-iron intervention****</b>  | Simmons 1993  | NR                    | 1xday            | N/A                     | Folic acid              | 12                         |
|                                  | Symonds 1969  | N/A                   | 1xday            | N/A                     | NR                      | min. 8                     |

*e., elemental iron; LWM, low molecular weight; NR, not reported*

*\*controlled-release*

*\*\*unclear if iron dextran was high or low molecular weight*

\*\*\*routine oral iron supplementation was withheld during intravenous iron but restarted 1wk post IV treatment

\*\*\*vitamins, placebo or no intervention at all

**b) Data from studies not contributing to the network meta-analysis for haemoglobin (n=23)**

| Intervention             | Study ID         | Preparation dose (mg) | Frequency | Total daily dose (mg) | Concomitant            | Treatment duration (weeks) |
|--------------------------|------------------|-----------------------|-----------|-----------------------|------------------------|----------------------------|
| <b>Oral preparations</b> |                  |                       |           |                       |                        |                            |
| <b>Ferrous betainate</b> | Preziosi 1997    | unknown               | 1xday     | 100 e.                | NR                     | ~ 12                       |
| <b>Ferrous fumarate</b>  | Singh 1998       | 200                   | 3xday     | 100 e.                | NR                     | 12                         |
|                          | Darwish 2017     | 60 e.                 | 3xday     | 180 e.                | NR                     | 4                          |
| <b>Ferrous sulphate</b>  | Al Momen 1996    | 300                   | 3xday     | 180 e.                | NR                     | NR                         |
|                          | Borg 2020        | 520                   | 1xday     | NR                    | NR                     | 4                          |
|                          | Han 2011         | 60                    | 1xday     | 60 e.                 | NR                     | 8                          |
|                          | Khalafallah 2010 | 250                   | 1xday     | 80 e.                 | NR                     | 15                         |
|                          | Komolafe 2003    | 200                   | 3xday     | 180 e.                | Folic acid, vitamin C  | NR                         |
|                          | Kumar 2005       | 100                   | 1xday     | 100 e.                | Folic acid, Mebendzole | 19                         |
|                          | Ma 2010          | 60                    | 1xday     | 60 e.                 | Folic acid, vitamin B2 | 8                          |
|                          | Mehta 2014       | 400                   | 3xday     | 360 e.                | NR                     | NR                         |
|                          | Menendez 1994    | 60                    | 1xday     | 60 e.                 | Folic acid             | 16                         |
|                          | Neogi 2019       | 100 e.                | 2xday     | 200 e.                | Folic acid             | 19                         |
|                          | Sharma 2004      | NR                    | 1xday     | 100 e.                | Folic acid             | 20                         |
|                          | Suharno 1993     | 60 e.                 | 1xday     | 60 e.                 | NR                     | 8                          |
| Sun 2010                 | 60               | 1xday                 | 60 e.     | Folic acid            | 8                      |                            |

| <b>Intervention</b>                          | <b>Study ID</b>     | <b>Preparation dose (mg)</b> | <b>Frequency</b>        | <b>Total daily dose (mg)</b>    | <b>Concomitant</b> | <b>Treatment duration (weeks)</b> |
|----------------------------------------------|---------------------|------------------------------|-------------------------|---------------------------------|--------------------|-----------------------------------|
| <b>Ferrous sulphate (cont.)</b>              | Tanumihardjo 2002   | 1.07 mmol                    | 1xday                   | 60 e.                           | NR                 | min. 8                            |
|                                              | Van Eijk 1978       | 100                          | 1xday                   | 60 e.                           | NR                 | 12                                |
| <b>Iron polymaltose complex</b>              | Al 2005             | 100                          | 3xday                   | 300 e.                          | Folic acid         | 11                                |
| <b>NaFeEDTA</b>                              | Han 2011            | 60                           | 1xday                   | 60 e.                           | NR                 | 8                                 |
| <b>IV and oral preparation</b>               |                     |                              |                         |                                 |                    |                                   |
| <b>Ferrous sulphate and iron polymaltose</b> | Khalafallah 2010    | 250 / NR                     | 1xday / single infusion | 80 e. / target set individually | NR                 | 13                                |
| <b>IV preparation</b>                        |                     |                              |                         |                                 |                    |                                   |
| <b>Iron polymaltose</b>                      | Singh 1998          | 50                           | Single infusion         | Target set individually         | Promethazine       | NR                                |
| <b>Iron dextran</b>                          | Darwish 2017 (LMW)  | 50                           | Single infusion         | Target set individually         | NR                 | One day                           |
|                                              | Darwish 2018 (LMW)  | 50                           | Single infusion         | Target set individually         | NR                 | One day                           |
|                                              | Hayat 2019          | 0.1 ml                       | Single infusion (6-8h)  | Target set individually         | NR                 | One day                           |
|                                              | Samsudin 2020 (LMW) | Max 20 mg / kg               | Single infusion (4-6h)  | Target set individually         | NR                 | One day                           |
| <b>Iron sucrose</b>                          | Al 2005             | 200 e.                       | Alternate days          | Target set individually         | Folic acid         | 5 days                            |
|                                              | Al Momen 1996       | 200 e.                       | NR                      | Target set individually         | NR                 | Until target reached              |
|                                              | Hayat 2019          | NR                           | NR                      | NR                              | NR                 | NR                                |
|                                              | Mehta 2014          | 100                          | Alternate days          | Target set individually         | NR                 | NR                                |
|                                              | Neogi 2019          | 200                          | NR                      | Target set individually         | Folic acid         | Until target reached              |

| Intervention                     | Study ID          | Preparation dose (mg) | Frequency                            | Total daily dose (mg)                      | Concomitant  | Treatment duration (weeks) |
|----------------------------------|-------------------|-----------------------|--------------------------------------|--------------------------------------------|--------------|----------------------------|
| <b>Iron sucrose (cont.)</b>      | Samsudin 2020     | 200                   | an interval of 1–3 days per week     | Target set individually; max 600 mg a week | NR           | Until target reached       |
| <b>IM preparation</b>            |                   |                       |                                      |                                            |              |                            |
| <b>Iron dextran</b>              | Komolafe 2003*    | 50                    | 3xweek                               | Target set individually                    | Promethazine | Until target reached       |
|                                  | Sharma 2004 (HMW) | 250 e.                | Three injections (1-month intervals) | Target set individually                    | Folic acid   | 12                         |
| <b>Iron sorbitol citric acid</b> | Kumar 2005        | 250 e.                | Two injections (4-6weeks interval)   | 250 e.                                     | Mebendzole   | 4-6                        |
| <b>Non-iron preparation</b>      |                   |                       |                                      |                                            |              |                            |
| <b>Lactoferrin</b>               | Borg 2020         | 100                   | 2xday                                | 200 e.                                     | NR           | 4                          |
|                                  | Darwish 2018      | 100                   | 2xday                                | 200 e.                                     | NR           | 4                          |
| <b>No-iron intervention**</b>    | Han 2011          | NA                    | 1xday                                | NA                                         | NR           | 8                          |
|                                  | Ma 2010           | NA                    | 1xday                                | NA                                         | NR           | 8                          |
|                                  | Menendez 1994     | NA                    | 1xday                                | NA                                         | Folic acid   | 16                         |
|                                  | Preziosi 1997     | NA                    | NR                                   | NA                                         | NR           | ~ 12                       |
|                                  | Suharno 1993      | NA                    | 1xday                                | NA                                         | NR           | 8                          |
|                                  | Sun 2010          | NA                    | 1xday                                | NA                                         | NR           | 8                          |
|                                  | Tanumihardjo 2002 | NA                    | 1xday                                | NA                                         | NR           | min. 8                     |
|                                  | Van Eijk 1978     | NA                    | NR                                   | NA                                         | NR           | 12                         |

*e.*, elemental iron; *LWM*, low molecular weight; *NR*, not reported

\*unclear if iron dextran was high or low molecular weight

\*\*vitamins, placebo or no intervention at all

**Appendix 5** Pair-wise meta-analysis for comparisons with more than one study available

**a) Haemoglobin (g/L)**

| Comparison<br>(Number of studies) | Number of<br>women | MD          | LCI          | UCI         | $\tau^2$    | $I^2$ (%)   | Hb at baseline<br>(g/dL) | Country  | Concomitant<br>medication | Total Daily<br>Dose of<br>elemental<br>iron (mg)* | Global<br>risk of<br>bias |
|-----------------------------------|--------------------|-------------|--------------|-------------|-------------|-------------|--------------------------|----------|---------------------------|---------------------------------------------------|---------------------------|
| <b>IFS vs LAC (4)</b>             | <b>457</b>         | <b>-4.1</b> | <b>-10.3</b> | <b>2.09</b> | <b>37.6</b> | <b>96.6</b> |                          |          |                           |                                                   |                           |
| <i>Gawai 2020</i>                 | 100                | 1.1         | -0.98        | 3.18        |             |             |                          |          |                           |                                                   |                           |
| <i>Nappi 2009</i>                 | 97                 | 3.0         | 0.8          | 5.2         |             |             | 101/101                  | Italy    | FA                        | 100 / NR                                          | Low                       |
| <i>Paesano 2010</i>               | 60                 | -15.0       | -20.1        | -9.9        |             |             | 100/100                  | India    | NR                        | 100 / NR                                          | High <sup>1</sup>         |
| <i>Rezk 2016</i>                  | 200                | -6.8        | -8.4         | -5.2        |             |             | 80/82                    | India    | IFS with FA               | 90 / NR                                           | High <sup>1,2</sup>       |
| <b>IFS vs IVISU (7)</b>           | <b>695</b>         | <b>-8.4</b> | <b>-13.8</b> | <b>-2.9</b> | <b>50.2</b> | <b>95.7</b> |                          |          |                           |                                                   |                           |
| <i>Abhilashini 2014</i>           | 100                | -3.3        | -6.0         | -0.6        |             |             | 72/69                    | India    | NR                        | 180 / NA                                          | Low                       |
| <i>Aggarwal 2012</i>              | 50                 | -10.4       | -15.4        | -5.4        |             |             | 60/63                    | India    | IVISU with FA             | 180 / NA                                          | Medium                    |
| <i>Arzoo 2020</i>                 | 150                | -15.3       | -17.4        | -13.2       |             |             |                          |          |                           |                                                   |                           |
| <i>Bayoumeu 2002</i>              | 47                 | -1.1        | -8.4         | 6.2         |             |             | 97/96                    | France   | FA                        | 240 / NA                                          | Low                       |
| <i>Dalal 2018</i>                 | 150                | -0.4        | -3.4         | 2.6         |             |             | 84/84                    | India    | NR                        | 200 / NA                                          | High <sup>2</sup>         |
| <i>Gupta 2014*</i>                | 100                | -6.2        | -8.2         | -4.2        |             |             | 79/78                    | India    | NR                        | 180 / NA                                          | Low                       |
| <i>Kochhar 2013*</i>              | 99                 | -21.0       | -24.6        | -17.4       |             |             | 76/77                    | India    | NR                        | 180 / NA                                          | Medium                    |
| <b>IFF vs IVISU (4)</b>           | <b>305</b>         | <b>-2.9</b> | <b>-5.0</b>  | <b>-0.8</b> | <b>0</b>    | <b>0</b>    |                          |          |                           |                                                   |                           |
| NCT00746551                       | 74                 | -4.0        | -7.8         | -0.2        |             |             | NR                       | Thailand | IFF with FA               | 200 / NA                                          | High <sup>2</sup>         |
| <i>Bhavi 2017</i>                 | 112                | 0.1         | -34.1        | 34.3        |             |             | 91/89                    | India    | FA                        | 200 / NA                                          | Medium                    |
| <i>Digumarthi 2008</i>            | 30                 | -6.0        | -12.8        | 0.8         |             |             | 81/81                    | India    | IFF with FA               | 100 / NA                                          | Medium                    |
| <i>Neeru 2012</i>                 | 89                 | -1.8        | -4.6         | 1.0         |             |             | 98/92                    | India    | NR                        | 100 / NA                                          | Low                       |
| <b>IFA vs IVISU (2)</b>           | <b>400</b>         | <b>-6.6</b> | <b>-7.8</b>  | <b>-5.5</b> | <b>0.1</b>  | <b>10.2</b> |                          |          |                           |                                                   |                           |
| <i>Deeba 2012</i>                 | 200                | -7.7        | -11.0        | -0.54       |             |             | 79/79                    | India    | IFA with FA               | 200 / NA                                          | Low                       |
| <i>Rudra 2016</i>                 | 200                | -6.3        | -7.5         | -0.51       |             |             | 78/79                    | India    | FA                        | 200 / NA                                          | High <sup>2</sup>         |
| <b>IMISCA vs IVISU (3)</b>        | <b>279</b>         | <b>-4.3</b> | <b>-12.3</b> | <b>3.8</b>  | <b>43.7</b> | <b>93.6</b> |                          |          |                           |                                                   |                           |
| <i>Dhanani 2012</i>               | 52                 | 5.2         | -4.5         | 14.9        |             |             | 83/76                    | India    | NR                        | NR                                                | High <sup>1</sup>         |
| <i>NRnthani 2017</i>              | 127                | -2.9        | -5.3         | -0.6        |             |             | 80/80                    | India    | NR                        | NR                                                | Medium                    |
| <i>Singh 2012</i>                 | 100                | -12.0       | -14.7        | -9.4        |             |             | 68/65                    | India    | NR                        | NR                                                | High <sup>3</sup>         |

\*additional administration of anti-parasitic tablets

MD, mean difference; LCI, lower confidence interval; UCI, upper confidence interval; Hb, Haemoglobin; NR, not reported, NA, not available

IFS, ferrous sulphate; LAC, lactoferrin; IVISU, intravenous iron sucrose; IMISCA, intramuscular iron sorbitol citric acid; IFF, ferrous fumarate; IFA, ferrous ascorbate; FA, folic acid;

Global risk of bias: 1. Incomplete outcome data, 2. Blinding of participants and personnel, 3. Selective reporting

**b) Serum ferritin (mcg/L)**

| Comparison<br>(Number of studies) | Number of<br>women | MD            | LCI            | UCI           | $\tau^2$     | I <sup>2</sup> (%) | Hb at<br>baseline<br>(g/L) | Country  | Concomitant<br>medication | Total Daily<br>Dose of<br>elemental iron<br>(mg) | Global<br>risk of<br>bias |
|-----------------------------------|--------------------|---------------|----------------|---------------|--------------|--------------------|----------------------------|----------|---------------------------|--------------------------------------------------|---------------------------|
| <b>IVISU vs IFA (2)</b>           | <b>400</b>         | <b>-29.43</b> | <b>-45.36</b>  | <b>-13.49</b> | <b>129.8</b> | <b>98.2</b>        |                            |          |                           |                                                  |                           |
| <i>Deeba 2012</i>                 | 200                | -37.69        | -41.89         | -33.49        |              |                    | 79/79                      | India    | IFA with FA               | NR / 200                                         | Low                       |
| <i>Rudra 2016</i>                 | 200                | -21.43        | -22.36         | -20.50        |              |                    | 78/79                      | India    | FA                        | NR / 200                                         | High <sup>2</sup>         |
| <b>IFS vs IVISU (4)</b>           | <b>400</b>         | <b>-55.01</b> | <b>-77.82</b>  | <b>-32.2</b>  | <b>297.6</b> | <b>98</b>          |                            |          |                           |                                                  |                           |
| <i>Aggarwal 2012</i>              | 50                 | -134.7        | -156.63        | -112.77       |              |                    | 60/63                      | India    | IVISU with FA             | 180 / NA                                         | Medium                    |
| <i>Dalal 2018</i>                 | 150                | -36.96        | -45.93         | 27.99         |              |                    | 84/84                      | India    | NR                        | 200 / NA                                         | High <sup>2</sup>         |
| <i>Gupta 2014*</i>                | 100                | -23.49        | -25.16         | -21.82        |              |                    | 79/78                      | India    | NR                        | 180 / NA                                         | Low                       |
| <i>Kochhar 2013*</i>              | 100                | -26.40        | -31.71         | -21.09        |              |                    | 76/77                      | India    | NR                        | 180 / NA                                         | Medium                    |
| <b>IFF vs IVISU (3)</b>           | <b>216</b>         | <b>-81.43</b> | <b>-118.05</b> | <b>-44.81</b> | <b>922.5</b> | <b>88.3</b>        |                            |          |                           |                                                  |                           |
| <i>NCT00746551</i>                | 74                 | -107.8        | -125.94        | -89.66        |              |                    | NR                         | Thailand | IFF with FA               | 200 / NA                                         | High <sup>2</sup>         |
| <i>Bhavi 2017</i>                 | 112                | -90.23        | -113.4         | -67.06        |              |                    | 91/89                      | India    | FA                        | 200 / NA                                         | Medium                    |
| <i>Digumarthi 2008</i>            | 30                 | -44.46        | -68.55         | -20.37        |              |                    | 81/81                      | India    | IFF with FA               | 100 / NA                                         | Medium                    |

\*additional administration of anti-parasitic tablets

MD, mean difference; LCI, lower confidence interval; UCI, upper confidence interval; Hb, haemoglobin; NA, not available

IVISU, intravenous iron sucrose; IFA, ferrous ascorbate; IFS, ferrous sulphate; IFF, ferrous fumarate; FA, folic acid;

Global risk of bias: 1. Incomplete outcome data, 2. Blinding of participants and personnel, 3. Selective reporting

## Appendix 6 Risk of bias

### a) Quality of evidence in the main network

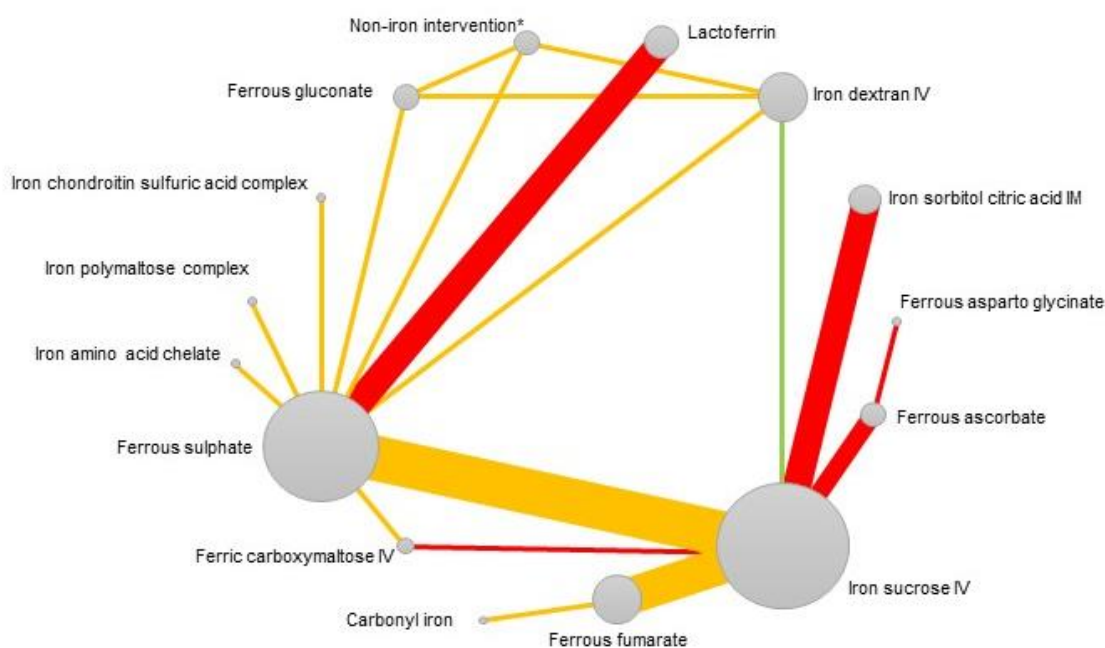

\*non-iron intervention: placebo, vitamin or no intervention

IM, intramuscular; IV, intravenous

The majority of studies in a given comparison has a given category of the global risk of bias: high (red) medium (yellow) low (green)

### b) Assessment of risk of bias and indirectness of study population by individual study

| Study ID                                                                     | Random sequence generation | Allocation concealment | Blinding of staff and participants | Blinding of outcome assessor | Incomplete outcome data | Selective reporting of outcomes | Global risk of bias* | Indirectness* |
|------------------------------------------------------------------------------|----------------------------|------------------------|------------------------------------|------------------------------|-------------------------|---------------------------------|----------------------|---------------|
| <b>Trials contributing data to the network meta-analysis for haemoglobin</b> |                            |                        |                                    |                              |                         |                                 |                      |               |
| Abhilashini 2014                                                             | Low                        | Unclear                | Low                                | Low                          | Low                     | Low                             | Low                  | Medium        |
| Aggarwal 2012                                                                | Unclear                    | Low                    | Unclear                            | Low                          | Unclear                 | Low                             | Medium               | Low           |
| Arzoo 2020                                                                   | Low                        | Unclear                | Unclear                            | Low                          | Low                     | Low                             | Medium               | Low           |
| Bayoumeu 2002                                                                | Low                        | Unclear                | Low                                | Low                          | Low                     | Low                             | Low                  | Low           |
| Bhavi 2017                                                                   | Unclear                    | Unclear                | Low                                | Low                          | Low                     | Low                             | Medium               | Low           |
| Breymann 2016                                                                | Unclear                    | Unclear                | Low                                | Low                          | Low                     | Low                             | Medium               | Low           |
| Dalal 2018                                                                   | Low                        | Low                    | High                               | Low                          | Unclear                 | Low                             | High                 | Low           |
| Deeba 2012                                                                   | Low                        | Low                    | Low                                | Low                          | Low                     | Low                             | Low                  | Low           |
| Dhanani 2012                                                                 | Unclear                    | Unclear                | Low                                | Low                          | High                    | Unclear                         | High                 | Medium        |
| Digumarthi 2008                                                              | Unclear                    | Unclear                | Unclear                            | Low                          | Unclear                 | Unclear                         | Medium               | Low           |
| Fochi 1985                                                                   | Unclear                    | Unclear                | Unclear                            | Low                          | Unclear                 | Low                             | Medium               | Low           |
| Gawai 2020                                                                   | Unclear                    | Unclear                | Unclear                            | Low                          | Low                     | Low                             | Medium               | Low           |
| Gupta 2014                                                                   | Low                        | Low                    | Low                                | Low                          | Low                     | Low                             | Low                  | Low           |
| Jose 2019                                                                    | Low                        | Unclear                | Low                                | Low                          | Low                     | Low                             | Low                  | Low           |
| Kamdi 2015                                                                   | High                       | High                   | Low                                | Low                          | High                    | Unclear                         | High                 | Low           |
| Kochhar 2013                                                                 | Low                        | Unclear                | Unclear                            | Low                          | Low                     | Low                             | Medium               | Low           |
| Nanthini 2017                                                                | Unclear                    | Unclear                | Low                                | Low                          | Low                     | Unclear                         | Medium               | Low           |
| Nappi 2009                                                                   | Low                        | Unclear                | Low                                | Low                          | Low                     | Low                             | Low                  | Low           |
| NCT00746551                                                                  | Unclear                    | Unclear                | High                               | Low                          | Low                     | Low                             | High                 | Low           |
| Neeru 2012                                                                   | Low                        | Unclear                | Low                                | Low                          | Low                     | Low                             | Low                  | Low           |



| Study ID       | Random sequence generation | Allocation concealment | Blinding of staff and participants | Blinding of outcome assessor | Incomplete outcome data | Selective reporting of outcomes | Global risk of bias* | Indirectness* |
|----------------|----------------------------|------------------------|------------------------------------|------------------------------|-------------------------|---------------------------------|----------------------|---------------|
| Ortiz 2011     | Low                        | Unclear                | Unclear                            | Low                          | Low                     | Low                             | Medium               | Low           |
| Paesano 2010   | Unclear                    | Unclear                | Unclear                            | Low                          | High                    | Unclear                         | High                 | Medium        |
| Rajwani 2020   | High                       | Unclear                | Unclear                            | Low                          | Low                     | Unclear                         | High                 | Low           |
| Rezk 2016      | Low                        | Low                    | High                               | Low                          | High                    | Low                             | High                 | Low           |
| Rudra 2016     | Low                        | Unclear                | High                               | Low                          | Unclear                 | Unclear                         | High                 | Low           |
| Sagaonkar 2009 | Unclear                    | Low                    | Unclear                            | Low                          | Low                     | Low                             | Medium               | Low           |
| Santiago 2020  | Low                        | Unclear                | Unclear                            | Low                          | Low                     | Low                             | Medium               | Low           |
| Singh 2012     | Unclear                    | Unclear                | Low                                | Low                          | Low                     | High                            | High                 | Low           |
| Symonds 1969   | Unclear                    | Unclear                | Low                                | Low                          | Low                     | Low                             | Medium               | Low           |
| Tariq 2015     | Low                        | Unclear                | Low                                | Low                          | Low                     | Low                             | Low                  | Low           |

**Trials not contributing data to the network meta-analysis for haemoglobin**

|                   |         |         |         |     |         |         |   |   |
|-------------------|---------|---------|---------|-----|---------|---------|---|---|
| Al 2005**         | Low     | Low     | Low     | Low | Low     | High    | - | - |
| AlMomen 1996      | High    | Unclear | Low     | Low | Low     | Unclear | - | - |
| Borg 2020         | Unclear | Unclear | Unclear | Low | Unclear | Unclear | - | - |
| Darwish 2017      | Low     | Low     | Low     | Low | Low     | Low     | - | - |
| Darwish 2018      | Low     | Low     | Low     | Low | High    | Low     | - | - |
| Han 2011          | High    | Unclear | Unclear | Low | Low     | Low     | - | - |
| Hayat 2019        | Unclear | Unclear | Unclear | Low | High    | Unclear | - | - |
| Khalafallah 2010  | Low     | Low     | Low     | Low | Low     | Low     | - | - |
| Komolafe 2003     | Low     | Unclear | Unclear | Low | Low     | Low     | - | - |
| Kumar 2005        | Unclear | Unclear | Unclear | Low | High    | Unclear | - | - |
| Ma 2010           | High    | Low     | Low     | Low | Low     | Low     | - | - |
| Mehta 2014        | Unclear | Unclear | High    | Low | Unclear | Unclear | - | - |
| Menendez 1994     | High    | Unclear | Unclear | Low | Low     | Low     | - | - |
| Neogi 2019        | Low     | Low     | High    | Low | High    | Low     | - | - |
| Preziosi 1997     | Low     | Unclear | Unclear | Low | Unclear | Unclear | - | - |
| Samsudin 2020     | Low     | Low     | Unclear | Low | Low     | Low     | - | - |
| Sharma 2004       | Unclear | Unclear | Low     | Low | High    | Low     | - | - |
| Simmons 1993      | Low     | Unclear | High    | Low | High    | Unclear | - | - |
| Singh 1998        | Unclear | Unclear | Unclear | Low | Low     | High    | - | - |
| Suharno 1993      | High    | Low     | Low     | Low | Low     | Unclear | - | - |
| Sun 2010          | Unclear | Low     | Low     | Low | Low     | Low     | - | - |
| Tanumihardjo 2002 | Unclear | Unclear | Unclear | Low | Low     | Low     | - | - |
| Van Eijk 1978     | Unclear | Unclear | Unclear | Low | Low     | Low     | - | - |

\*We created global risk of bias and assessed population indirectness only for trials contributing data to the haemoglobin network meta-analysis;

\*\*Trial contributing data to network meta-analysis for serum ferritin

## Appendix 7 Detailed network meta-analysis outputs

### 1. Network summary

|                                | Haemoglobin | Serum ferritin |
|--------------------------------|-------------|----------------|
| Number of studies              | 30          | 15             |
| Number of women                | 3243        | 1396           |
| Number of unique interventions | 15          | 9              |

### 2. Network evidence from a consistency model assuming constant heterogeneity variance across all comparisons

#### a) Haemoglobin (g/L)

| Comparisons                    |                                 | Network evidence     |
|--------------------------------|---------------------------------|----------------------|
| Experimental                   | Comparator                      | MD (95% CI)          |
| Ferrous aspartic glycinate     | Ferrous ascorbate               | 13.3 (-2.9 to 29.5)  |
| Ferrous ascorbate              | Iron sucrose (IV)               | -7.0 (-16.0 to 2.0)  |
| Ferrous fumarate               | Carbonyl iron                   | 2.4 (-10.1 to 15.0)  |
|                                | Iron sucrose (IV)               | -3.6 (-11.1 to 3.9)  |
| Ferrous gluconate              | Iron dextran (IV)               | -0.5 (-12.3 to 11.3) |
|                                | “Non-iron intervention”         | 6.7 (-5.8 to 19.2)   |
| Ferrous sulphate               | Iron amino acid chelate         | -1.4 (-14.7 to 11.9) |
|                                | Ferrous gluconate               | -3.2 (-15.0 to 8.6)  |
|                                | Iron chondroitin sulphuric acid | 3.3 (-9.6 to 16.2)   |
|                                | Iron polymaltose complex        | 1.5 (-11.3 to 14.3)  |
|                                | Iron dextran (IV)               | -3.7 (-12.9 to 5.6)  |
|                                | Ferric carboxymaltose (IV)      | -8.5 (-16.5 to -0.5) |
|                                | Iron sucrose (IV)               | -7.2 (-11.7 to -2.6) |
|                                | Lactoferrin                     | -4.1 (-10.5 to 2.3)  |
| “Non-iron intervention”        | 3.5 (-8.3 to 15.3)              |                      |
| Iron dextran (IV)              | “Non-iron intervention”         | 7.2 (-4.6 to 19.0)   |
| Iron sucrose (IV)              | Iron dextran (IV)               | 3.5 (-5.8 to 12.8)   |
|                                | Ferric carboxymaltose (IV)      | -1.3 (-8.9 to 6.2)   |
| Iron sorbitol citric acid (IM) | Iron sucrose (IV)               | -4.3 (-12.2 to 3.5)  |

Between study heterogeneity estimate (standard error):  $\tau=6.4(1.2)$

### b) Serum ferritin (mcg/L)

| Comparisons                |                                | Network evidence       |
|----------------------------|--------------------------------|------------------------|
| Experimental               | Comparator                     | MD (95% CI)            |
| Ferrous aspartic glycinate | Ferrous ascorbate              | 9.8 (-66.1 to 85.6)    |
|                            | Ferrous sulphate               |                        |
| Iron sucrose (IV)          | Iron amino acid chelate        | 4.2 (-71.7 to 80.2)    |
|                            | Iron polymaltose complex       | -15.9 (-72.7 to 40.9)  |
|                            | Iron sucrose (IV)              | -49.7 (-85.7 to -13.6) |
|                            | Lactoferrin                    | -20.0 (-95.6 to 55.6)  |
| Iron sucrose (IV)          | Ferrous ascorbate              | 29.6 (-23.9 to 82.9)   |
|                            | Ferrous fumarate               | 81.2 (35.8 to 126.6)   |
|                            | Iron polymaltose complex       | 33.7 (-23.0 to 90.5)   |
|                            | Iron sorbitol citric acid (IM) | 0.2 (-75.7 to 76.1)    |

Between study heterogeneity estimate (standard error):  $\tau=38.5(11.0)$

### 3. Local and global tests of inconsistency

#### (a) Haemoglobin (g/L)

| Treatment comparison |        | Difference between direct and indirect estimates (SE)* | p-value for inconsistency |
|----------------------|--------|--------------------------------------------------------|---------------------------|
| IFS                  | IVIDX  | -5.2 (9.7)                                             | 0.59                      |
| IFS                  | IVIFCM | -9.5 (8.3)                                             | 0.25                      |
| IFS                  | IVISU  | 8.3 (6.4)                                              | 0.20                      |
| IFS                  | NOFE   | -10.4 (19.4)                                           | 0.59                      |
| FASG                 | IFA    | -14.2 (**)                                             | -                         |
| ICARB                | IFF    | -4.7 (**)                                              | -                         |
| IFA                  | IVISU  | -7.3 (**)                                              | -                         |
| IFF                  | IVISU  | -4.4 (**)                                              | -                         |
| IFG                  | IFS    | 10.4 (19.4)                                            | 0.59                      |
| IFG                  | IVIDX  | -10.4 (19.4)                                           | 0.59                      |
| IMISCA               | IVISU  | -10.0 (**)                                             | -                         |
| IVIDX                | IVISU  | -5.2 (9.7)                                             | 0.59                      |
| IVIDX                | NOFE   | 10.4 (19.4)                                            | 0.59                      |
| IVIFCM               | IVISU  | -9.5 (8.3)                                             | 0.25                      |

FASG, ferrous asparto glycinate; ICARB, carbonyl iron; IFA, ferrous ascorbate; IFF, ferrous fumarate; IFG, ferrous gluconate; IFS, ferrous sulphate; IMISCA, intramuscular iron sorbitol citric acid; IVIDX, intravenous iron dextran; IVIFCM, intravenous ferric carboxymaltose; IVISU, intravenous iron sucrose; NOFE, "Non-iron intervention" (placebo/vitamin/no intervention)

Global test for inconsistency,  $p=0.43$

\*Difference is direct estimate – indirect estimate

\*\*Not possible to estimate standard error due to network location

**(b) Serum ferritin (mcg/L)**

| Treatment comparison |       | Difference between direct and indirect estimates (SE)* | p-value for inconsistency |
|----------------------|-------|--------------------------------------------------------|---------------------------|
| IFS                  | IPMCX | -38.0 (61.5)                                           | 0.54                      |
| IFS                  | IVISU | 38.1 (61.3)                                            | 0.54                      |
| FASG                 | IFA   | -50.4 (**)                                             | -                         |
| IFA                  | IVISU | -61.6 (**)                                             | -                         |
| IFF                  | IVISU | -18.4 (**)                                             | -                         |
| IMISCA               | IVISU | -99.1 (**)                                             | -                         |
| IPMCX                | IVISU | -38.0 (61.5)                                           | 0.54                      |

*FASG, ferrous asparto glycinate; IFA, ferrous ascorbate; IFF, ferrous fumarate; IFG, ferrous gluconate; IFS, ferrous sulphate; IMISCA, intramuscular iron sorbitol citric acid; IVISU, intravenous iron sucrose; IPMCX, iron polymaltose complex;*

*Global test for inconsistency, p=0.54*

*\*Difference is direct estimate – indirect estimate*

*\*\*Not possible to estimate standard error due to network location*

## 4. Ranking of iron interventions

### a) Haemoglobin

| Rank             | FASG        | IVIFCM      | IVISU       | LAC         | IVIDX       | IFF         | IFG         | IMISCA      | IAAC        | ICARB       | IFA         | IFS         | IPMCX       | ICSAC       | NOFE        |
|------------------|-------------|-------------|-------------|-------------|-------------|-------------|-------------|-------------|-------------|-------------|-------------|-------------|-------------|-------------|-------------|
| Best             | 57.1        | 15.5        | 2.1         | 2.0         | 2.8         | 1.2         | 5.0         | 1.3         | 4.9         | 5.1         | 0           | 0           | 1.8         | 1.0         | 0.2         |
| 2nd              | 10.6        | 26.2        | 11.8        | 5.9         | 6.0         | 4.5         | 8.7         | 4.5         | 6.9         | 7.3         | 1.6         | 0           | 3.2         | 2.0         | 0.8         |
| 3rd              | 5.7         | 16.1        | 24.2        | 8.1         | 7.9         | 6.6         | 7.0         | 5.2         | 5.6         | 5.4         | 2.3         | 0           | 2.8         | 1.9         | 1.1         |
| 4th              | 4.4         | 11.9        | 25.1        | 9.4         | 8.2         | 8.4         | 6.7         | 6.1         | 4.8         | 4.7         | 3.3         | 0.1         | 3.1         | 2.3         | 1.6         |
| 5th              | 3.3         | 9.2         | 18.6        | 11.0        | 9.2         | 10.0        | 7.2         | 8.3         | 5.3         | 5.1         | 4.6         | 0.3         | 3.9         | 2.3         | 1.7         |
| 6th              | 3.1         | 7.2         | 10.8        | 11.8        | 10.1        | 11.3        | 7.9         | 9.7         | 5.7         | 5.6         | 5.9         | 1.5         | 3.9         | 3.0         | 2.7         |
| 7th              | 2.9         | 5.1         | 4.9         | 12.7        | 10.4        | 11.2        | 7.5         | 10.6        | 5.9         | 5.6         | 7.2         | 3.9         | 5.3         | 3.7         | 3.1         |
| 8th              | 2.4         | 3.5         | 1.9         | 11.1        | 9.9         | 10.4        | 7.8         | 10.5        | 6.7         | 5.9         | 8.4         | 8.5         | 5.1         | 4.1         | 3.8         |
| 9th              | 2.2         | 2.3         | 0.6         | 9.0         | 9.3         | 9.7         | 7.1         | 9.6         | 6.0         | 5.8         | 8.4         | 14.6        | 5.6         | 4.7         | 5.1         |
| 10th             | 1.4         | 1.4         | 0.1         | 7.5         | 7.5         | 8.3         | 6.6         | 8.7         | 6.9         | 5.8         | 8.6         | 20.0        | 6.3         | 5.2         | 5.7         |
| 11th             | 1.5         | 0.7         | 0           | 4.8         | 6.4         | 6.8         | 6.9         | 7.9         | 6.8         | 6.2         | 9.9         | 21.8        | 6.8         | 6.4         | 7.2         |
| 12th             | 1.3         | 0.6         | 0           | 3.5         | 5.4         | 5.6         | 7.3         | 6.5         | 7.6         | 7.0         | 10.4        | 17.4        | 9.1         | 8.5         | 9.7         |
| 13th             | 1.5         | 0.3         | 0           | 2.0         | 4.2         | 3.8         | 6.9         | 5.7         | 8.8         | 8.5         | 11.9        | 8.6         | 11.3        | 12.5        | 13.9        |
| 14th             | 1.3         | 0.1         | 0           | 1.0         | 2.2         | 1.9         | 5.3         | 3.6         | 9.8         | 10.1        | 10.9        | 2.9         | 14.4        | 16.5        | 19.9        |
| Worst            | 1.2         | 0           | 0           | 0.3         | 0.6         | 0.4         | 2.2         | 1.6         | 8.4         | 11.8        | 6.4         | 0.4         | 17.4        | 25.9        | 23.4        |
| <b>MEAN RANK</b> | <b>3.1</b>  | <b>3.7</b>  | <b>4.1</b>  | <b>6.7</b>  | <b>7.2</b>  | <b>7.4</b>  | <b>7.6</b>  | <b>8.0</b>  | <b>8.8</b>  | <b>8.9</b>  | <b>10.0</b> | <b>10.4</b> | <b>10.6</b> | <b>11.6</b> | <b>12.0</b> |
| <b>SUCRA</b>     | <b>0.85</b> | <b>0.81</b> | <b>0.78</b> | <b>0.59</b> | <b>0.56</b> | <b>0.55</b> | <b>0.53</b> | <b>0.50</b> | <b>0.47</b> | <b>0.43</b> | <b>0.36</b> | <b>0.33</b> | <b>0.32</b> | <b>0.25</b> | <b>0.22</b> |

Shaded values are probabilities above 5%

FASG, ferrous asparto glycinate; IAAC, iron amino acid chelate; ICARB, carbonyl iron; ICSAC, iron chondroitinsulfuric acid complex; IFA, ferrous ascorbate; IFF, ferrous fumarate; IFG, ferrous gluconate; IFS, ferrous sulphate; IMISCA, intramuscular iron sorbitol citric acid; IPMCX, iron polymaltose complex; IVIDX, intravenous iron dextran; IVIFCM, intravenous ferric carboxymaltose; IVISU, intravenous iron sucrose; LAC, lactoferrin; NOFE, "Non-iron intervention" (placebo/vitamin/no intervention)

**b) Serum ferritin**

| <b>Rank</b>      | <b>IVISU</b> | <b>IMISCA</b> | <b>FASG</b> | <b>IFA</b>  | <b>LAC</b>  | <b>IPMCX</b> | <b>IAAC</b> | <b>IFS</b>  | <b>IFF</b>  |
|------------------|--------------|---------------|-------------|-------------|-------------|--------------|-------------|-------------|-------------|
| Best             | 19.5         | 34.6          | 21.0        | 2.7         | 13.1        | 4.4          | 4.8         | 0           | 0           |
| 2nd              | 36.4         | 17.9          | 12.8        | 8.4         | 10.7        | 8.3          | 5.0         | 0.3         | 0.1         |
| 3rd              | 27.9         | 12.7          | 11.2        | 14.9        | 11.0        | 12.5         | 7.2         | 1.9         | 0.6         |
| 4th              | 12.4         | 10.6          | 12.8        | 20.1        | 11.7        | 15.1         | 8.7         | 7.3         | 1.4         |
| 5th              | 3.3          | 8.6           | 10.3        | 18.3        | 12.7        | 17.9         | 9.7         | 15.8        | 3.3         |
| 6th              | 0.4          | 6.0           | 7.9         | 14.3        | 11.4        | 15.7         | 11.5        | 26.6        | 6.2         |
| 7th              | 0.1          | 4.2           | 8.0         | 11.8        | 10.3        | 12.5         | 12.4        | 29.4        | 11.3        |
| 8th              | 0            | 3.7           | 8.8         | 7.3         | 10.7        | 10.0         | 19.0        | 16.2        | 24.4        |
| Worst            | 0            | 1.7           | 7.3         | 2.1         | 8.4         | 3.6          | 21.6        | 2.5         | 52.7        |
| <b>MEAN RANK</b> | <b>2·5</b>   | <b>3·0</b>    | <b>4·2</b>  | <b>4·8</b>  | <b>4·8</b>  | <b>5·0</b>   | <b>6·2</b>  | <b>6·3</b>  | <b>8·1</b>  |
| <b>SUCRA</b>     | <b>0·82</b>  | <b>0·74</b>   | <b>0·60</b> | <b>0·53</b> | <b>0·53</b> | <b>0·50</b>  | <b>0·35</b> | <b>0·34</b> | <b>0·11</b> |

*Shaded values are probabilities above 5%*

*FASG, ferrous asparto glycinate; IAAC, iron amino acid chelate; IFA, ferrous ascorbate; IFF, ferrous fumarate; IFS, ferrous sulphate; IPMCX, iron polymaltose complex; IMISCA, intramuscular iron sorbitol citric acid; IVISU, intravenous iron sucrose; LAC, lactoferrin*

## Appendix 8 Additional analyses

### 1. Secondary approach to intervention grouping

#### a) Route of administration – Haemoglobin (g/L)

##### (i) Network summary and map

|                                | Haemoglobin |
|--------------------------------|-------------|
| Number of studies              | 22          |
| Number of women                | 2405        |
| Number of unique interventions | 5           |

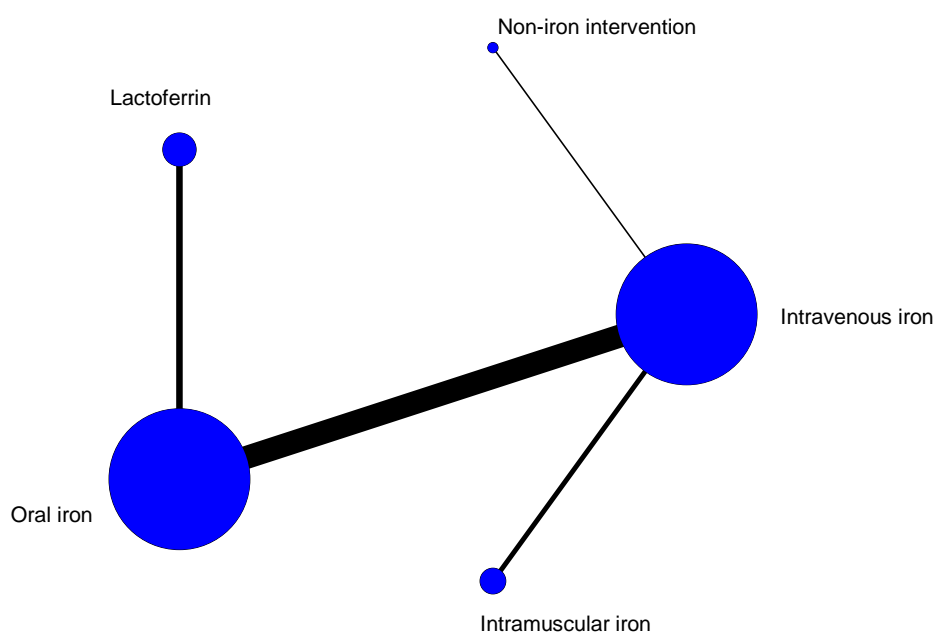

##### (ii) Network evidence for Haemoglobin from a consistency model assuming constant heterogeneity variance across all comparisons

| Comparisons      | Comparator              | Network evidence MD (95% CI) |
|------------------|-------------------------|------------------------------|
| Intravenous iron | Intramuscular iron      | 4.3 (-4.0 to 12.1)           |
|                  | Oral iron               | 6.6 (3.1 to 10.2)            |
|                  | “Non-iron intervention” | 6.0 (-6.4 to 18.4)           |
| Lactoferrin      | Oral iron               | 4.1 (-2.2 to 10.5)           |

Between study heterogeneity estimate (standard error):  $\tau=6.3(1.2)$

(iii) Interval plot with “Non-iron intervention” as the reference route of administration

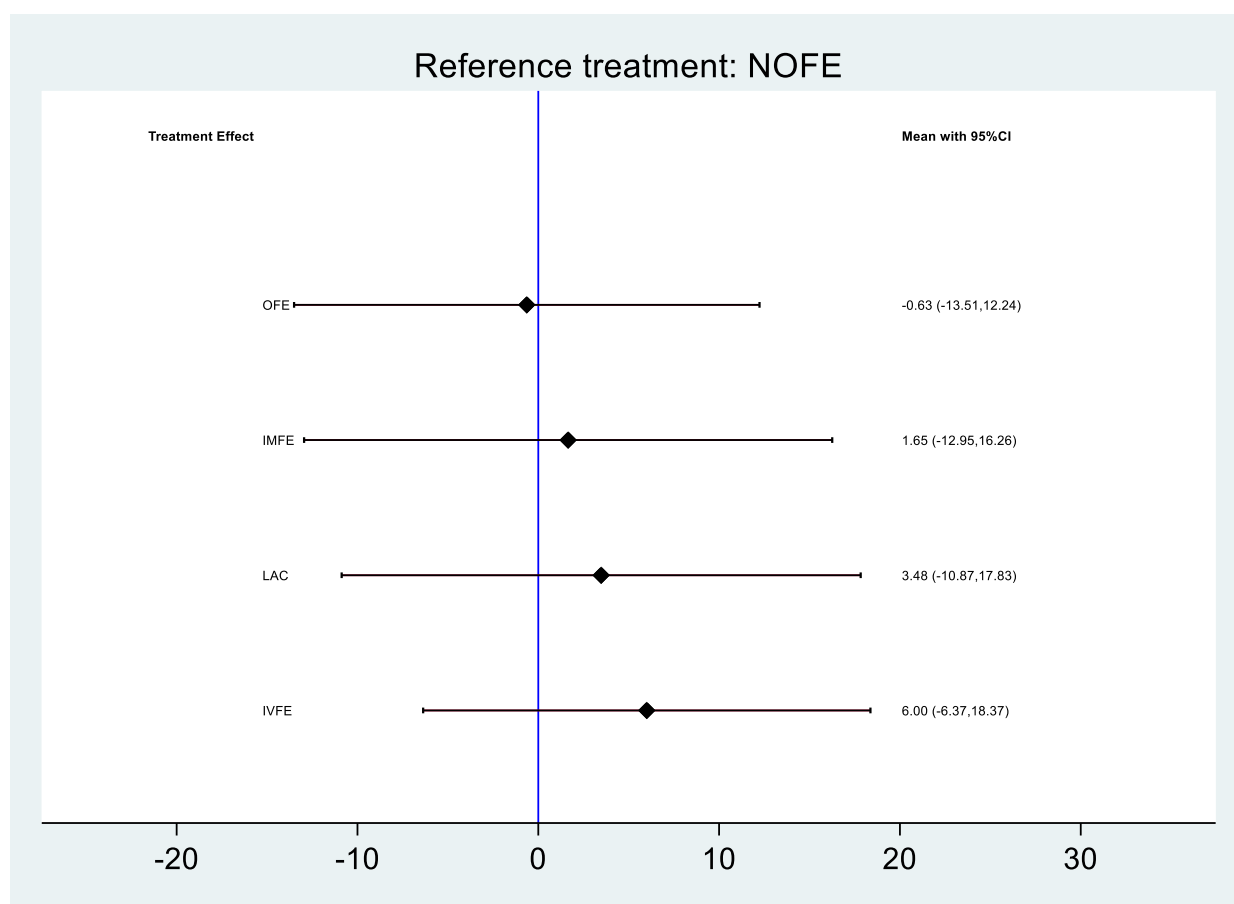

LAC, lactoferrin; IVFE, intravenous iron; IMFE, Intramuscular iron; NOFE, “Non-iron intervention”; OFE, Oral iron

(iv) Ranking of routes of administration for haemoglobin

| Rank             | IVFE        | LAC         | IMFE        | NOFE        | OFE         |
|------------------|-------------|-------------|-------------|-------------|-------------|
| Best             | 54.0        | 20.9        | 10.7        | 14.4        | 0           |
| 2nd              | 37.3        | 30.0        | 19.4        | 11.8        | 1.6         |
| 3rd              | 8.2         | 28.6        | 27.9        | 16.5        | 18.8        |
| 4th              | 0.5         | 15.2        | 23.8        | 15.7        | 44.9        |
| Worst            | 0           | 5.4         | 18.3        | 41.7        | 34.7        |
| <b>MEAN RANK</b> | <b>1.6</b>  | <b>2.5</b>  | <b>3.2</b>  | <b>3.6</b>  | <b>4.1</b>  |
| <b>SUCRA</b>     | <b>0.86</b> | <b>0.62</b> | <b>0.45</b> | <b>0.35</b> | <b>0.22</b> |

Shaded values are probabilities above 5%

LAC, lactoferrin; IVFE, intravenous iron; IMFE, Intramuscular iron; NOFE, “Non-iron intervention”; OFE, Oral iron



**b) Iron salt & route of administration – haemoglobin (g/L)**

**(i) Network summary and map**

|                                       | <b>Haemoglobin</b> |
|---------------------------------------|--------------------|
| <b>Number of studies</b>              | 24                 |
| <b>Number of women</b>                | 2533               |
| <b>Number of unique interventions</b> | 7                  |

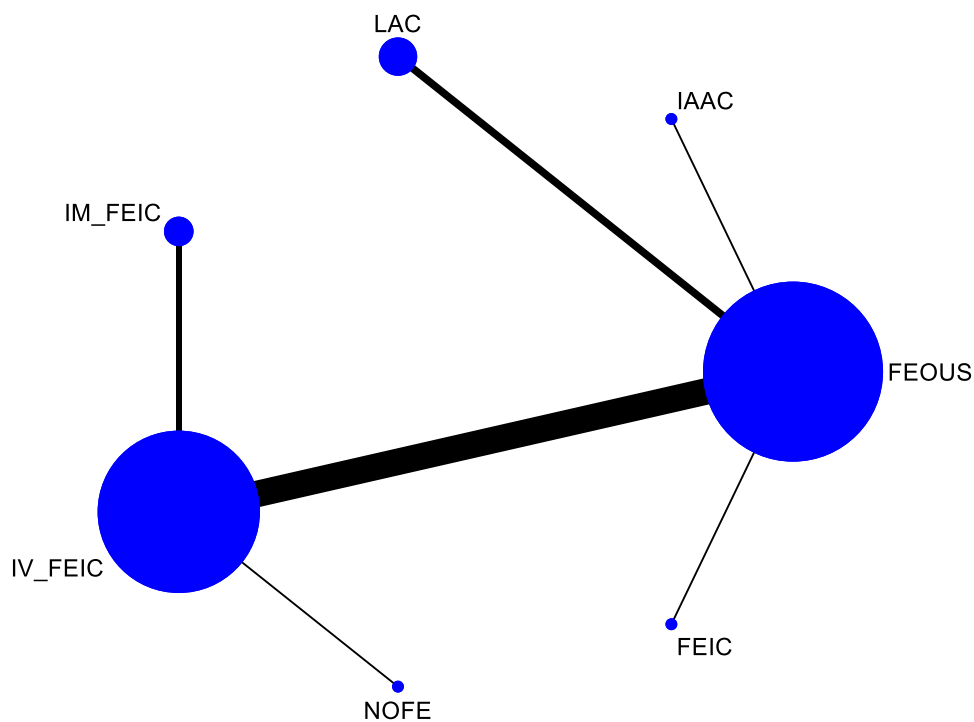

Unique interventions: LAC, Lactoferrin; IAAC, Iron amino acid chelate; IV\_FEIC, Intravenous ferric salt; IM\_FEIC, Intramuscular ferric salt; FEIC, Oral ferric salt; FEOUS, Oral ferrous salt; NOFE, “Non-iron intervention”

**(ii) Network evidence for haemoglobin from a consistency model assuming constant heterogeneity variance across all comparisons**

| <b>Comparisons</b>             | <b>Comparator</b>         | <b>Network evidence MD (95% CI)</b> |
|--------------------------------|---------------------------|-------------------------------------|
| <b>Oral ferrous salt</b>       | Oral ferric salt          | 1.5 (-11.2 to 14.2)                 |
|                                | Iron amino acid chelate   | -1.4 (14.6 to 11.8)                 |
|                                | Lactoferrin               | -4.1 (-10.5 to 2.2)                 |
|                                | Intravenous ferric salt   | -6.6 (-10.2 to -3.1)                |
| <b>Intravenous ferric salt</b> | Intramuscular ferric salt | 4.3 (-3.4 to 12.1)                  |
|                                | “Non-iron intervention”   | 6.0 (-6.4 to 18.4)                  |

Between study heterogeneity estimate (standard error):  $\tau=6.3(1.2)$

(iii) Interval plot with “Non-iron intervention” as the reference iron salt and route of administration

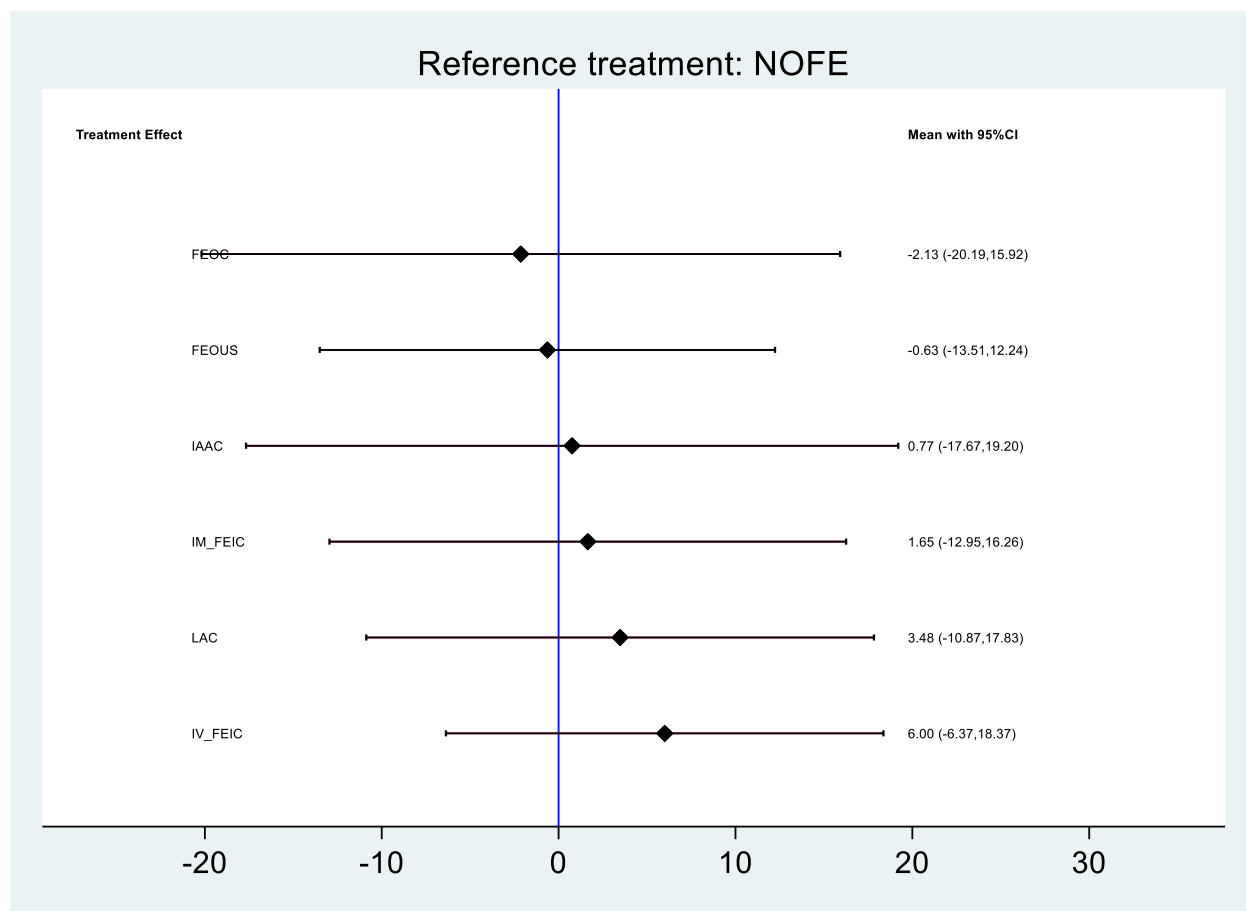

Unique interventions: LAC, Lactoferrin; IAAC, Iron amino acid chelate; IV\_FEIC, Intravenous ferric salt; IM\_FEIC, Intramuscular ferric salt; FEIC, Oral ferric salt; FEOUS, Oral ferrous salt; NOFE, “Non-iron intervention”

(iv) Ranking of iron salt and route of administration for haemoglobin

| Rank             | IV_FEIC     | LAC         | IM_FEIC     | IAAC        | NOFE        | FEOUS       | FEIC        |
|------------------|-------------|-------------|-------------|-------------|-------------|-------------|-------------|
| Best             | 37.2        | 16.5        | 8.1         | 18.2        | 12.8        | 0           | 7.2         |
| 2nd              | 39.4        | 21.3        | 13.2        | 9.7         | 9.5         | 0.3         | 6.6         |
| 3rd              | 18.3        | 24.6        | 19.3        | 11.7        | 12.5        | 5.0         | 8.6         |
| 4th              | 4.3         | 19.4        | 20.0        | 12.4        | 12.4        | 20.9        | 10.6        |
| 5th              | 0.7         | 10.6        | 16.6        | 11.8        | 11.6        | 36.8        | 11.8        |
| 6th              | 0           | 5.6         | 14.5        | 15.7        | 17.3        | 28.7        | 18.1        |
| Worst            | 0           | 1.9         | 8.3         | 20.5        | 23.9        | 8.3         | 37.0        |
| <b>MEAN RANK</b> | <b>1.9</b>  | <b>3.1</b>  | <b>4.0</b>  | <b>4.2</b>  | <b>4.5</b>  | <b>5.1</b>  | <b>5.2</b>  |
| <b>SUCRA</b>     | <b>0.85</b> | <b>0.65</b> | <b>0.50</b> | <b>0.47</b> | <b>0.42</b> | <b>0.31</b> | <b>0.31</b> |

Shaded values are probabilities above 5%

LAC, Lactoferrin; IAAC, Iron amino acid chelate; IV\_FEIC, Intravenous ferric salt; IM\_FEIC, Intramuscular ferric salt; FEIC, Oral ferric salt; FEOUS, Oral ferrous salt; NOFE, “Non-iron intervention”

## 2. Sensitivity analyses

### a) Interventions without vitamins – haemoglobin (g/L)

#### (i) Network summary and map

|                                | Haemoglobin |
|--------------------------------|-------------|
| Number of studies              | 20          |
| Number of women                | 1989        |
| Number of unique interventions | 14          |

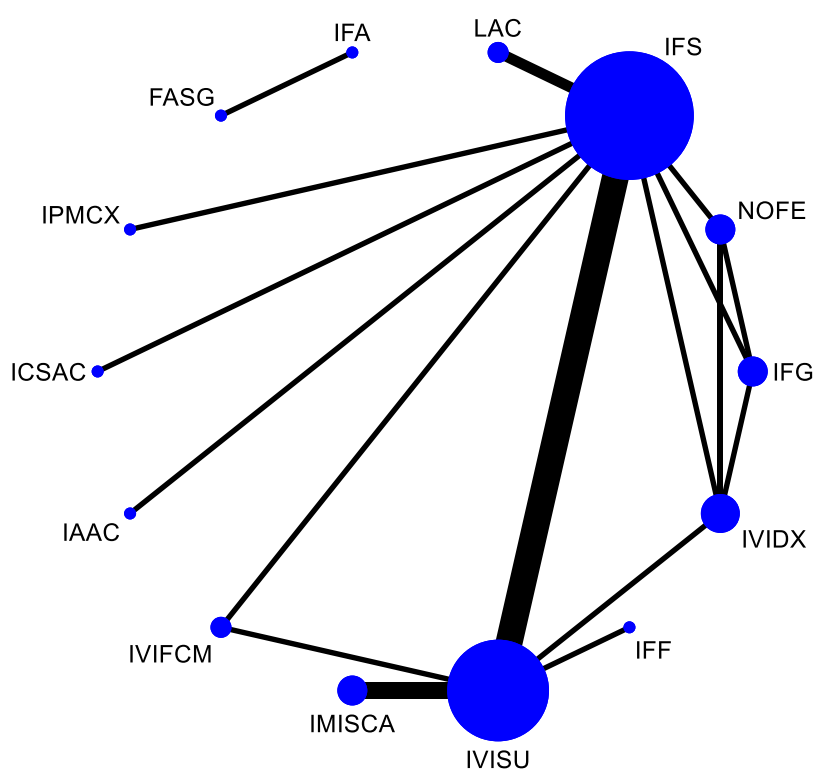

Unique interventions: FASG, ferrous asparto glycinate; IAAC, iron amino acid chelate; ICSAC, iron chondroitinsulfuric acid complex; IFA, ferrous ascorbate; IFF, ferrous fumarate; IFG, ferrous gluconate; IFS, ferrous sulphate; IMISCA, intramuscular iron sorbitol citric acid; IPMCX, iron polymaltose complex; IVIDX, intravenous iron dextran; IVIFCM, intravenous ferric carboxymaltose; IVISU, intravenous iron sucrose; LAC, lactoferrin; NOFE, “Non-iron intervention” (placebo/vitamin/no intervention)

NB disconnected network, so following analyses do not contain the FASG-IFA comparison (Kamdi 2015). Therefore, only 12 unique interventions are included in the connected network.

(ii) **Network evidence for haemoglobin from a consistency model assuming constant heterogeneity variance across all comparisons**

| Comparisons                           |                                 | Network evidence     |
|---------------------------------------|---------------------------------|----------------------|
| Experimental                          | Comparator                      | MD (95% CI)          |
| <b>Ferrous fumarate</b>               | Iron sucrose (IV)               | -1.8 (-17.7 to 14.1) |
| <b>Ferrous gluconate</b>              | Iron dextran (IV)               | -0.7 (-15.5 to 14.2) |
|                                       | “Non-iron intervention”         | 6.7 (-9.0 to 22.4)   |
| <b>Ferrous sulphate</b>               | Iron amino acid chelate         | -1.4 (-17.8 to 15.0) |
|                                       | Ferrous gluconate               | -3.4 (-18.2 to 11.5) |
|                                       | Iron chondroitin sulphuric acid | 3.3 (-12.8 to 19.4)  |
|                                       | Iron polymaltose complex        | 1.5 (-14.5 to 17.5)  |
|                                       | Iron dextran (IV)               | -4.0 (-15.7 to 7.6)  |
|                                       | Ferric carboxymaltose (IV)      | -6.7 (-18.4 to 5.0)  |
|                                       | Iron sucrose (IV)               | -7.9 (-14.4 to -1.3) |
|                                       | Lactoferrin                     | -6.6 (-18.1 to 4.8)  |
|                                       | “Non-iron intervention”         | 3.3 (-11.5 to 18.2)  |
| <b>Iron dextran (IV)</b>              | “Non-iron intervention”         | 7.4 (-7.5 to 22.2)   |
| <b>Iron sucrose (IV)</b>              | Iron dextran (IV)               | 3.8 (-7.9 to 15.5)   |
|                                       | Ferric carboxymaltose (IV)      | 1.2 (-10.5 to 12.9)  |
| <b>Iron sorbitol citric acid (IM)</b> | Iron sucrose (IV)               | -4.0 (-13.6 to 5.6)  |

Between study heterogeneity estimate (standard error):  $\tau=8.0(2.0)$

(iii) Interval plot with ferrous sulphate as the reference intervention

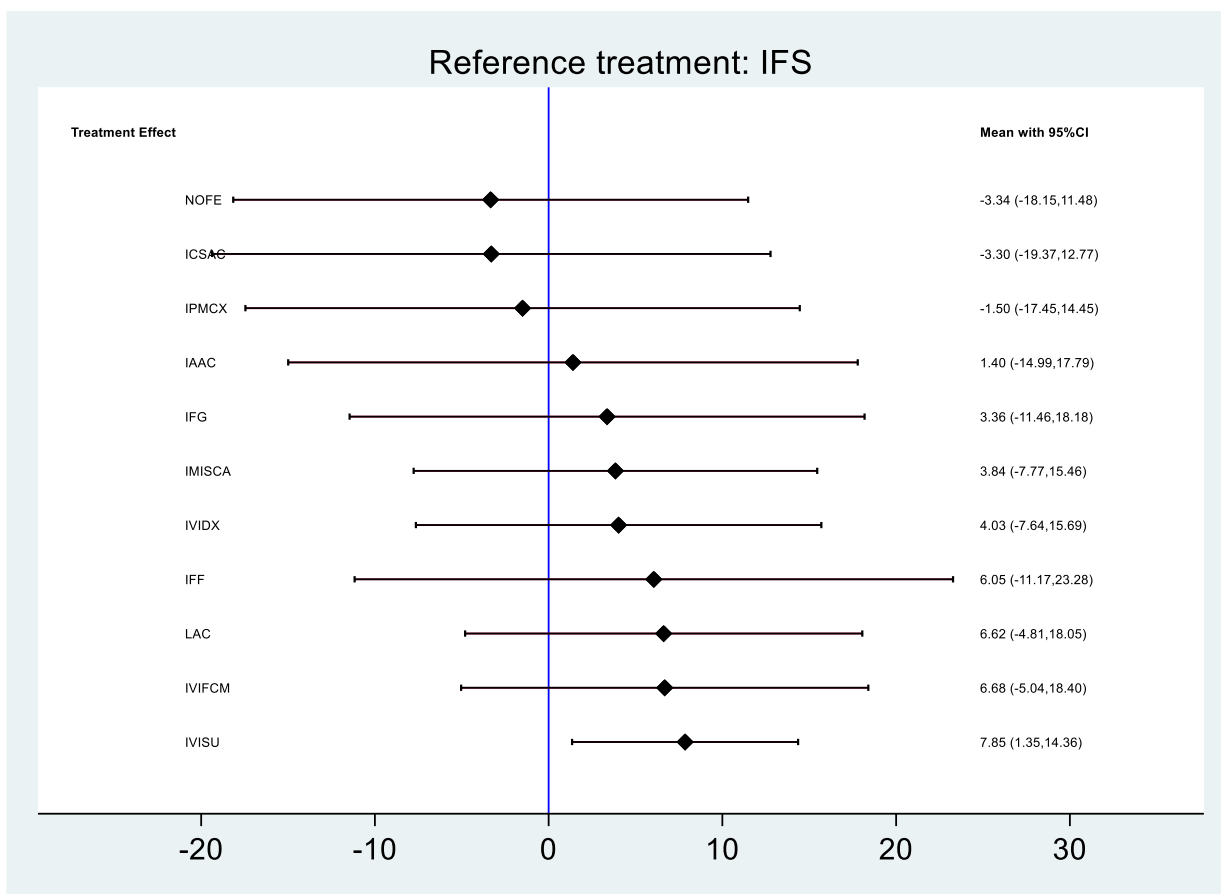

IAAC, iron amino acid chelate; ICSAC, Iron chondroitinsulfuric acid complex; IFF, ferrous fumarate; IFG, ferrous gluconate; IFS, ferrous sulphate; IMISCA, intramuscular iron sorbitol citric acid; IPMCX, iron polymaltose complex; IVIDX, intravenous iron dextran; IVIFCM, intravenous ferric carboxymaltose; IVISU, intravenous iron sucrose; LAC, Lactoferrin; NOFE, "Non-iron intervention" (placebo/vitamin/no intervention)

(iv) Ranking of interventions without vitamins for Haemoglobin

| Rank             | IVISU       | LAC         | IVIFCM      | IFF         | IVIDX       | IMISCA      | IFG         | IAAC        | IPMCX       | IFS         | ICSAC       | NOFE        |
|------------------|-------------|-------------|-------------|-------------|-------------|-------------|-------------|-------------|-------------|-------------|-------------|-------------|
| Best             | 7.5         | 16.3        | 15.8        | 21.1        | 5.9         | 5.7         | 10.5        | 9.1         | 4.4         | 0.0         | 2.6         | 1.3         |
| 2nd              | 19.8        | 14.2        | 13.9        | 11.1        | 8.4         | 7.6         | 9.0         | 6.9         | 4.0         | 0.0         | 3.1         | 2.0         |
| 3rd              | 25.1        | 11.5        | 12.5        | 8.8         | 9.7         | 8.9         | 7.5         | 6.0         | 4.3         | 0.2         | 3.4         | 2.2         |
| 4th              | 21.7        | 10.8        | 11.5        | 8.5         | 10.6        | 10.9        | 7.5         | 6.1         | 4.9         | 0.9         | 3.6         | 3.0         |
| 5th              | 14.2        | 10.7        | 11.2        | 7.6         | 11.8        | 11.6        | 8.6         | 7.0         | 5.6         | 3.2         | 4.7         | 3.8         |
| 6th              | 7.2         | 9.7         | 9.7         | 7.4         | 12.6        | 12.2        | 9.2         | 7.4         | 5.7         | 8.4         | 5.2         | 5.3         |
| 7th              | 3.1         | 8.2         | 7.5         | 7.0         | 11.3        | 10.8        | 9.3         | 7.8         | 6.8         | 16.5        | 5.5         | 6.2         |
| 8th              | 1.1         | 6.7         | 5.7         | 5.8         | 9.7         | 9.3         | 8.6         | 7.5         | 7.5         | 23.7        | 6.6         | 7.7         |
| 9th              | 0.3         | 4.8         | 4.8         | 5.9         | 8.0         | 8.4         | 8.7         | 8.5         | 8.6         | 24.0        | 8.6         | 9.5         |
| 10th             | 0.1         | 3.5         | 3.8         | 6.3         | 6.5         | 6.5         | 8.7         | 10.1        | 12.4        | 15.9        | 11.8        | 14.4        |
| 11th             | 0.0         | 2.4         | 2.6         | 5.7         | 4.3         | 5.3         | 8.2         | 11.9        | 15.8        | 6.2         | 17.7        | 20.0        |
| Worst            | 0.0         | 1.2         | 1.1         | 5.0         | 1.3         | 2.6         | 4.2         | 11.7        | 20.1        | 1.0         | 27.4        | 24.5        |
| <b>MEAN RANK</b> | <b>3.6</b>  | <b>4.6</b>  | <b>4.6</b>  | <b>5.2</b>  | <b>5.9</b>  | <b>6.0</b>  | <b>6.2</b>  | <b>7.1</b>  | <b>8.3</b>  | <b>8.3</b>  | <b>9.0</b>  | <b>9.2</b>  |
| <b>SUCRA</b>     | <b>0.77</b> | <b>0.67</b> | <b>0.67</b> | <b>0.62</b> | <b>0.56</b> | <b>0.54</b> | <b>0.53</b> | <b>0.45</b> | <b>0.34</b> | <b>0.34</b> | <b>0.28</b> | <b>0.25</b> |

Shaded values are probabilities above 5%

IAAC, iron amino acid chelate; ICSAC, Iron chondroitinsulfuric acid complex; IFF, ferrous fumarate; IFG, ferrous gluconate; IFS, ferrous sulphate; IMISCA, intramuscular iron sorbitol citric acid; IPMCX, iron polymaltose complex; IVIDX, intravenous iron dextran; IVIFCM, intravenous ferric carboxymaltose; IVISU, intravenous iron sucrose; LAC, Lactoferrin; NOFE, “Non-iron intervention” (placebo/vitamin/no intervention)

**(b) Study at low and medium risk of bias – Haemoglobin (g/L)**

**(i) Network summary and map**

|                                       | <b>Haemoglobin</b> |
|---------------------------------------|--------------------|
| <b>Number of studies</b>              | 21                 |
| <b>Number of women</b>                | 2207               |
| <b>Number of unique interventions</b> | 14                 |

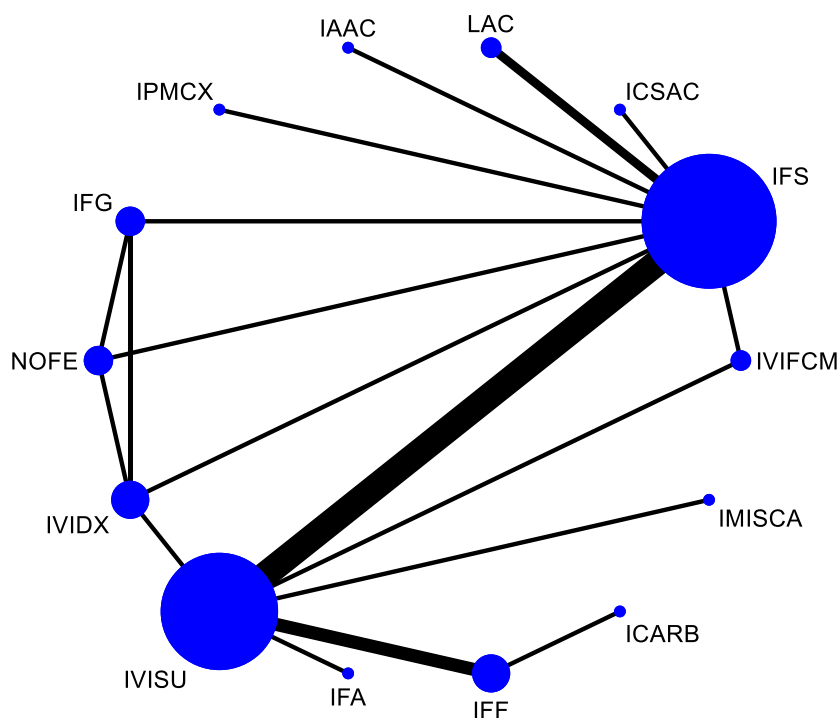

Unique interventions: IAAC, iron amino acid chelate; ICARB, carbonyl iron; ICSAC, iron chondroitinsulfuric acid complex; IFA, ferrous ascorbate; IFF, ferrous fumarate; IFG, ferrous gluconate; IFS, ferrous sulphate; IMISCA, intramuscular iron sorbitol citric acid; IPMCX, iron polymaltose complex; IVIDX, intravenous iron dextran; IVIFCM, intravenous ferric carboxymaltose; IVISU, intravenous iron sucrose; LAC, lactoferrin; NOFE, “Non-iron intervention” (placebo/vitamin/no intervention)

(ii) **Network evidence for Haemoglobin from a consistency model assuming constant heterogeneity variance across all comparisons**

| <b>Comparisons</b>                    |                                 | <b>Network evidence</b> |
|---------------------------------------|---------------------------------|-------------------------|
| <b>Experimental</b>                   | <b>Comparator</b>               | <b>MD (95% CI)</b>      |
| <b>Ferrous ascorbate</b>              | Iron sucrose (IV)               | -7.7 (-20.1 to 4.7)     |
| <b>Ferrous fumarate</b>               | Carbonyl iron                   | 2.4 (-9.9 to 14.7)      |
|                                       | Iron sucrose (IV)               | -3.4 (-12.4 to 5.6)     |
| <b>Ferrous gluconate</b>              | Iron dextran (IV)               | -0.8 (-12.2 to 10.7)    |
|                                       | “Non-iron intervention”         | 6.7 (-5.5 to 18.9)      |
| <b>Ferrous sulphate</b>               | Iron amino acid chelate         | -1.4 (-14.4 to 11.6)    |
|                                       | Ferrous gluconate               | -3.5 (-14.9 to 8.0)     |
|                                       | Iron chondroitin sulphuric acid | 3.3 (-9.3 to 15.9)      |
|                                       | Iron polymaltose complex        | 1.5 (-11.0 to 14.0)     |
|                                       | Iron dextran (IV)               | -4.2 (-13.3 to 4.8)     |
|                                       | Ferric carboxymaltose (IV)      | -8.3 (-17.6 to 0.9)     |
|                                       | Iron sucrose (IV)               | -8.3 (-13.1 to -3.5)    |
|                                       | Lactoferrin                     | 2.0 (-6.7 to 10.8)      |
|                                       | “Non-iron intervention”         | 3.2 (-8.2 to 14.7)      |
| <b>Iron dextran (IV)</b>              | “Non-iron intervention”         | 7.5 (-4.0 to 18.9)      |
| <b>Iron sucrose (IV)</b>              | Iron dextran (IV)               | 4.1 (-5.0 to 13.2)      |
|                                       | Ferric carboxymaltose (IV)      | -0.1 (-9.3 to 9.2)      |
| <b>Iron sorbitol citric acid (IM)</b> | Iron sucrose (IV)               | -2.9 (-15.3 to 9.5)     |

*Between study heterogeneity estimate (standard error):  $\tau=6.2(1.6)$*

(iii) Interval plot with ferrous sulphate as the reference intervention

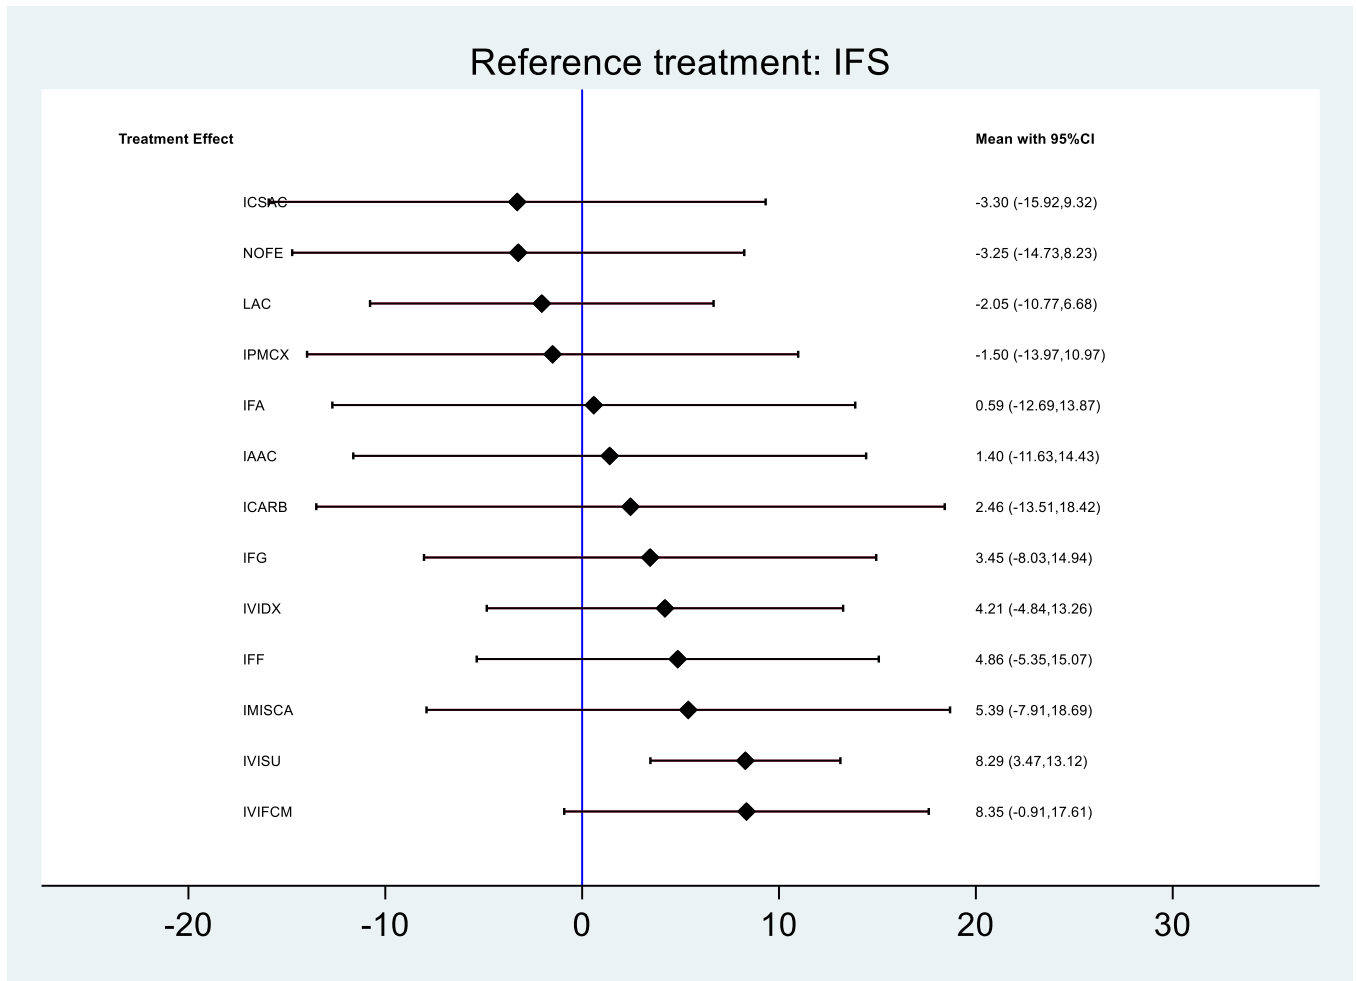

Shaded values are probabilities above 5%

IAAC, iron amino acid chelate; ICARB, carbonyl iron; ICSAC, iron chondroitinsulfuric acid complex; IFA, ferrous ascorbate; IFF, ferrous fumarate; IFG, ferrous gluconate; IFS, ferrous sulphate; IMISCA, intramuscular iron sorbitol citric acid; IPMCX, iron polymaltose complex; IVIDX, intravenous iron dextran; IVIFCM, intravenous ferric carboxymaltose; IVISU, intravenous iron sucrose; LAC, lactoferrin; NOFE, "Non-iron intervention" (placebo/vitamin/no intervention)



(iv) Ranking of interventions from low and medium risk of bias studies for Haemoglobin

| Rank             | IVISU | IVIFCM | IMISCA | IFF  | IVIDX | IFG  | ICARB | IAAC | IFA  | IFS  | IPMCX | ICSAC | LAC  | NOFE |
|------------------|-------|--------|--------|------|-------|------|-------|------|------|------|-------|-------|------|------|
| Best             | 10.5  | 27.3   | 17.3   | 6.0  | 4.9   | 8.1  | 10.6  | 6.6  | 4.2  | 0.0  | 2.3   | 1.4   | 0.3  | 0.5  |
| 2nd              | 25.3  | 18.0   | 10.1   | 9.2  | 6.8   | 7.7  | 7.0   | 5.8  | 4.1  | 0.0  | 2.7   | 1.7   | 0.6  | 0.8  |
| 3rd              | 28.6  | 12.4   | 9.4    | 10.9 | 9.0   | 6.8  | 5.9   | 5.0  | 4.3  | 0.1  | 3.0   | 2.0   | 1.3  | 1.3  |
| 4th              | 19.9  | 11.5   | 8.7    | 12.9 | 10.7  | 8.1  | 6.5   | 6.5  | 4.9  | 0.4  | 3.4   | 2.1   | 2.3  | 2.1  |
| 5th              | 10.0  | 9.6    | 8.8    | 12.8 | 12.5  | 9.4  | 7.7   | 6.8  | 6.7  | 1.4  | 4.5   | 3.6   | 3.5  | 2.8  |
| 6th              | 4.0   | 7.5    | 8.5    | 11.6 | 13.3  | 10.0 | 7.5   | 7.5  | 7.9  | 4.7  | 5.7   | 3.9   | 4.4  | 3.6  |
| 7th              | 1.1   | 4.9    | 7.5    | 9.9  | 12.0  | 9.8  | 6.5   | 7.4  | 8.0  | 10.5 | 6.6   | 4.7   | 6.0  | 5.2  |
| 8th              | 0.4   | 3.2    | 6.1    | 7.8  | 9.7   | 8.4  | 6.4   | 7.2  | 7.9  | 16.7 | 7.1   | 5.8   | 7.2  | 6.0  |
| 9th              | 0.1   | 2.4    | 4.9    | 6.3  | 7.3   | 7.3  | 6.1   | 6.9  | 7.0  | 22.6 | 7.1   | 6.4   | 8.7  | 7.2  |
| 10th             | 0.0   | 1.3    | 5.1    | 4.8  | 5.7   | 6.6  | 6.3   | 7.3  | 7.5  | 21.7 | 8.1   | 6.9   | 10.3 | 8.4  |
| 11th             | 0.0   | 1.0    | 4.2    | 3.8  | 4.3   | 6.6  | 6.4   | 8.3  | 8.6  | 13.8 | 9.6   | 9.4   | 13.3 | 10.7 |
| 12th             | 0.0   | 0.6    | 4.2    | 2.5  | 2.5   | 5.3  | 7.1   | 8.4  | 9.8  | 6.2  | 11.4  | 12.1  | 16.1 | 13.9 |
| 13th             | 0.0   | 0.3    | 3.2    | 1.3  | 1.1   | 4.2  | 7.7   | 8.7  | 9.7  | 1.7  | 13.2  | 16.2  | 15.2 | 17.6 |
| Worst            | 0.0   | 0.1    | 2.0    | 0.3  | 0.3   | 1.6  | 8.3   | 7.8  | 9.3  | 0.2  | 15.4  | 23.8  | 10.9 | 19.9 |
| <b>MEAN RANK</b> | 3.1   | 3.6    | 5.6    | 5.7  | 6.1   | 6.6  | 7.4   | 8.0  | 8.5  | 9.2  | 9.6   | 10.6  | 10.3 | 10.7 |
| <b>SUCRA</b>     | 0.84  | 0.80   | 0.65   | 0.64 | 0.61  | 0.57 | 0.51  | 0.47 | 0.42 | 0.37 | 0.34  | 0.26  | 0.29 | 0.25 |

Shaded values are probabilities above 5%

IAAC, iron amino acid chelate; ICARB, carbonyl iron; ICSAC, iron chondroitinsulfuric acid complex; IFA, ferrous ascorbate; IFF, ferrous fumarate; IFG, ferrous gluconate; IFS, ferrous sulphate; IMISCA, intramuscular iron sorbitol citric acid; IPMCX, iron polymaltose complex; IVIDX, intravenous iron dextran; IVIFCM, intravenous ferric carboxymaltose; IVISU, intravenous iron sucrose; LAC, lactoferrin; NOFE, "Non-iron intervention" (placebo/vitamin/no intervention)

### 3. Subgroup analysis by country income group

#### a) Low and middle income countries – Haemoglobin (g/L)

##### (i) Network summary and map

|                                | Haemoglobin |
|--------------------------------|-------------|
| Number of studies              | 22          |
| Number of women                | 2541        |
| Number of unique interventions | 11          |

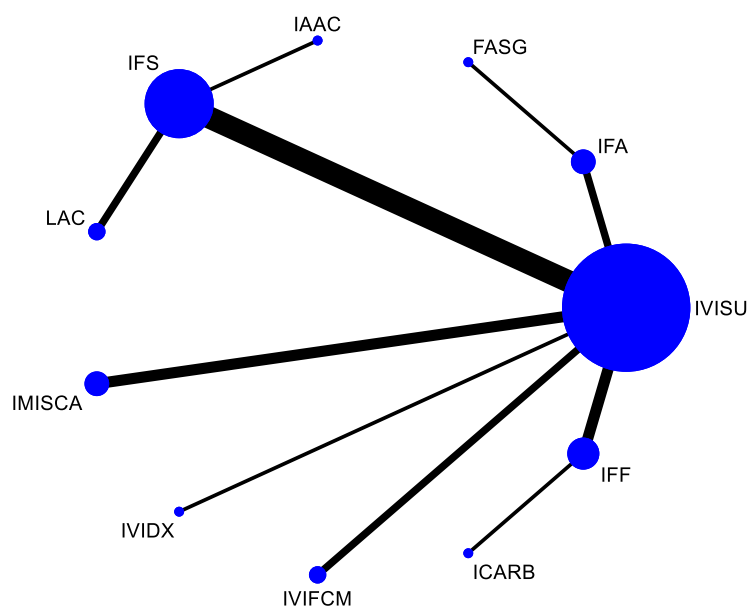

Unique interventions: FASG, ferrous asparto glycinate; IAAC, iron amino acid chelate; ICARB, carbonyl iron; IFA, ferrous ascorbate; IFF, ferrous fumarate; IFS, ferrous sulphate; IMISCA, intramuscular iron sorbitol citric acid; IVIDX, intravenous iron dextran; IVIFCM, intravenous ferric carboxymaltose; IVISU, intravenous iron sucrose; LAC, lactoferrin;

##### (ii) Network evidence for Haemoglobin from a consistency model assuming constant heterogeneity variance across all comparisons

| Comparisons                           | Comparator                 | Network evidence MD (95% CI) |
|---------------------------------------|----------------------------|------------------------------|
| <b>Ferrous aspartic glycinate</b>     | Ferrous ascorbate          | 13.3 (-2.6 to 29.2)          |
| <b>Ferrous ascorbate</b>              | Iron sucrose (IV)          | -7.0 (-15.7 to 1.7)          |
| <b>Ferrous fumarate</b>               | Carbonyl iron              | 2.4 (-9.9 to 14.7)           |
|                                       | Iron sucrose (IV)          | -3.4 (-12.4 to 5.6)          |
| <b>Ferrous sulphate</b>               | Iron amino acid chelate    | -1.4 (-14.4 to 11.6)         |
|                                       | Iron sucrose (IV)          | -9.4 (-14.5 to -4.2)         |
|                                       | Lactoferrin                | -2.9 (-11.6 to 5.8)          |
| <b>Iron sucrose (IV)</b>              | Iron dextran (IV)          | 1.0 (-11.6 to 13.6)          |
|                                       | Ferric carboxymaltose (IV) | -4.2 (-13.1 to 4.6)          |
| <b>Iron sorbitol citric acid (IM)</b> | Iron sucrose (IV)          | -4.4 (-12.0 to 3.3)          |

Between study heterogeneity estimate (standard error):  $\tau=6.2(1.4)$

(iii) **Interval plot with ferrous sulphate as the reference intervention**

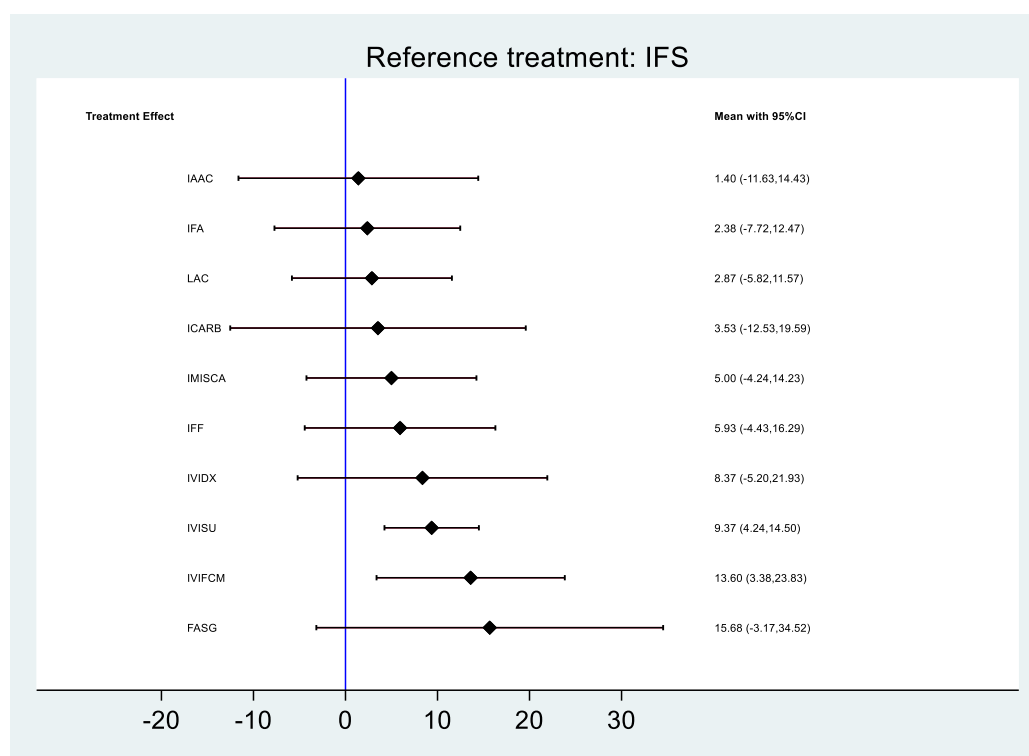

Unique interventions: FASG, ferrous asparto glycinate; IAAC, iron amino acid chelate; ICARB, carbonyl iron; IFA, ferrous ascorbate; IFF, ferrous fumarate; IFS, ferrous sulphate; IMISCA, intramuscular iron sorbitol citric acid; IVIDX, intravenous iron dextran; IVIFCM, intravenous ferric carboxymaltose; IVISU, intravenous iron sucrose; LAC, lactoferrin;

(iv) **Ranking of interventions from studies from low and middle income countries for Haemoglobin**

| Rank             | IVIFCM      | FASG        | IVISU       | IVIDX       | IFF         | IMISCA      | ICARB       | LAC         | IFA         | IAAC        | IFS         |
|------------------|-------------|-------------|-------------|-------------|-------------|-------------|-------------|-------------|-------------|-------------|-------------|
| Best             | 29.1        | 50.6        | 1.2         | 10.0        | 1.6         | 0.9         | 4.1         | 0.7         | 0.1         | 1.7         | 0.0         |
| 2nd              | 35.5        | 16.6        | 9.8         | 15.6        | 5.6         | 2.9         | 6.8         | 2.5         | 0.9         | 3.8         | 0.0         |
| 3rd              | 15.8        | 7.8         | 28.3        | 14.6        | 9.3         | 6.0         | 6.9         | 4.2         | 2.4         | 4.7         | 0.0         |
| 4th              | 7.7         | 5.4         | 32.5        | 10.5        | 11.8        | 9.7         | 6.7         | 5.6         | 4.7         | 5.2         | 0.1         |
| 5th              | 5.0         | 4.8         | 19.0        | 10.2        | 15.6        | 14.4        | 7.9         | 8.7         | 7.8         | 5.9         | 0.8         |
| 6th              | 3.5         | 4.0         | 7.4         | 9.6         | 16.7        | 15.8        | 9.0         | 11.6        | 11.7        | 8.2         | 2.6         |
| 7th              | 2.0         | 3.3         | 1.6         | 8.3         | 14.3        | 16.5        | 9.8         | 13.2        | 14.6        | 9.3         | 7.2         |
| 8th              | 0.8         | 2.3         | 0.3         | 6.8         | 10.5        | 13.8        | 9.5         | 14.6        | 15.7        | 10.0        | 15.7        |
| 9th              | 0.3         | 1.8         | 0.0         | 5.6         | 7.3         | 9.3         | 8.7         | 14.3        | 14.1        | 11.9        | 26.7        |
|                  | 0.1         | 1.8         | 0.0         | 4.4         | 5.5         | 6.9         | 11.1        | 13.4        | 14.3        | 12.5        | 30.1        |
| Worst            | 0.1         | 1.7         | 0.0         | 4.3         | 1.8         | 4.0         | 19.6        | 11.2        | 13.7        | 26.9        | 16.9        |
| <b>MEAN RANK</b> | <b>2.5</b>  | <b>2.7</b>  | <b>3.9</b>  | <b>4.9</b>  | <b>5.9</b>  | <b>6.5</b>  | <b>7.1</b>  | <b>7.5</b>  | <b>7.9</b>  | <b>8.0</b>  | <b>9.2</b>  |
| <b>SUCRA</b>     | <b>0.85</b> | <b>0.83</b> | <b>0.71</b> | <b>0.61</b> | <b>0.51</b> | <b>0.45</b> | <b>0.39</b> | <b>0.35</b> | <b>0.31</b> | <b>0.31</b> | <b>0.18</b> |

Shaded values are probabilities above 5%

FASG, ferrous asparto glycinate; ICARB, carbonyl iron; IFA, ferrous ascorbate; IFF, ferrous fumarate; IFS, ferrous sulphate; IMISCA, intramuscular iron sorbitol citric acid; IVIDX, intravenous iron dextran; IVIFCM, intravenous ferric carboxymaltose; IVISU, intravenous iron sucrose; LAC, lactoferrin

**(b) High income countries – Haemoglobin (g/L)**

**(i) Network summary and map**

|                                | Haemoglobin |
|--------------------------------|-------------|
| Number of studies              | 8           |
| Number of women                | 702         |
| Number of unique interventions | 10          |

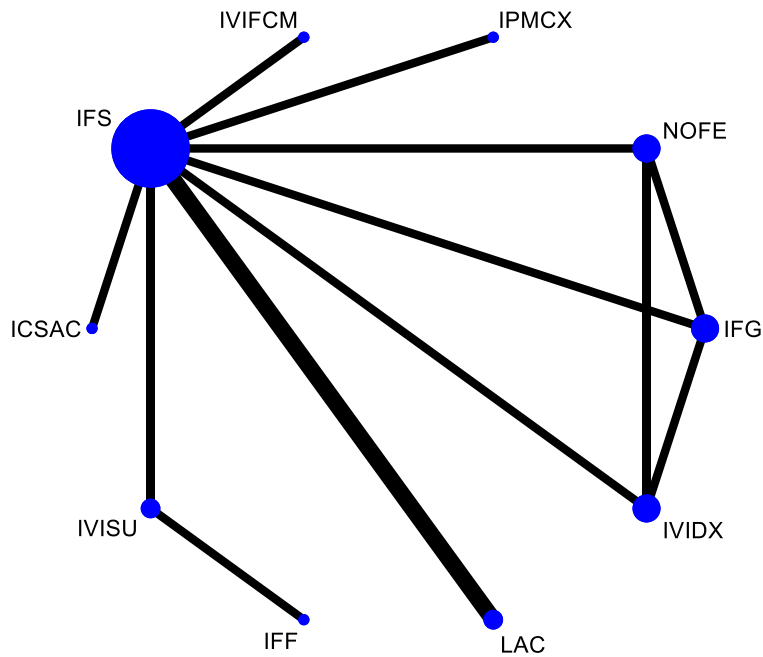

Unique interventions: ICSAC, iron chondroitinsulfuric acid complex; IFF, ferrous fumarate; IFG, ferrous gluconate; IFS, ferrous sulphate; IPMCX, iron polymaltose complex; IVIDX, intravenous iron dextran; IVIFCM, intravenous ferric carboxymaltose; IVISU, intravenous iron sucrose; LAC, lactoferrin; NOFE, “Non-iron intervention” (placebo/vitamin/no intervention)

**(ii) Network evidence for Haemoglobin from a consistency model assuming constant heterogeneity variance across all comparisons**

Between study heterogeneity estimate (standard error):  $\tau=12.5(9.1)$

Due to considerable heterogeneity and lack of data, further results are not presented

## Appendix 9 Adverse events

| Iron preparation          | Group                 | Adverse Event                                 | Event                                 | Sample | Study          |                |
|---------------------------|-----------------------|-----------------------------------------------|---------------------------------------|--------|----------------|----------------|
| FASG                      | GI                    | GI upset                                      | 1                                     | 26     | Kamdi 2015     |                |
| ICARB                     | GI                    | Abdominal pain                                | 3                                     | 75     | Sagaonkar 2009 |                |
|                           |                       | Constipation                                  | 38                                    | 110    | Sagaonkar 2009 |                |
|                           |                       | Diarrhoea                                     | 5                                     | 77     | Sagaonkar 2009 |                |
|                           |                       | Nausea                                        | 33                                    | 105    | Sagaonkar 2009 |                |
|                           |                       | Vomiting                                      | 2                                     | 74     | Sagaonkar 2009 |                |
| IAAC                      | GI                    | Nausea                                        | 11                                    | 24     | Santiago 2019  |                |
|                           |                       | Vomiting                                      | 9                                     | 24     | Santiago 2019  |                |
|                           |                       | Constipation                                  | 7                                     | 24     | Santiago 2019  |                |
|                           |                       | Dark Stool                                    | 16                                    | 24     | Santiago 2019  |                |
|                           |                       | Epigastric Pain                               | 2                                     | 24     | Santiago 2019  |                |
| IFA                       | General               | Fever                                         | NR                                    | 100    | Rudra 2016     |                |
|                           |                       | Hot flush                                     | 0                                     | 100    | Deeba 2012     |                |
|                           |                       | Itch (entire body)                            | NR                                    | 100    | Rudra 2016     |                |
|                           |                       | Metallic taste                                | 0                                     | 100    | Deeba 2012     |                |
|                           |                       |                                               | 4                                     | 100    | Rudra 2016     |                |
|                           | GI                    | Diarrhoea                                     |                                       | 5      | 100            | Deeba 2012     |
|                           |                       |                                               |                                       | 4      | 100            | Rudra 2016     |
|                           |                       | Epigastric discomfort and bloating            | 16                                    | 100    | Rudra 2016     |                |
|                           |                       | GI upset*                                     | 3                                     | 24     | Kamdi 2015     |                |
|                           |                       | Nausea                                        | 0                                     | 100    | Deeba 2012     |                |
|                           |                       |                                               | NR                                    | 100    | Rudra 2016     |                |
|                           |                       | Upper GI upset*                               | 22                                    | 100    | Deeba 2012     |                |
|                           |                       | Vomiting                                      | 4                                     | 100    | Rudra 2016     |                |
|                           |                       | <b>Local/reaction</b>                         | Injection site swelling/redness/pain  | NR     | 100            | Rudra 2016     |
|                           |                       | <b>Muscular</b>                               | Arthralgia                            |        | 0              | 100            |
|                           |                       |                                               |                                       | NR     | 100            | Rudra 2016     |
|                           | <b>Nervous System</b> | Dizziness                                     | 0                                     | 100    | Deeba 2012     |                |
|                           | <b>Other</b>          | Serious Adverse Events                        | NR                                    | 100    | Rudra 2016     |                |
|                           | IFF                   | GI                                            | Abdominal discomfort                  | 13     | 33             | Darwish 2017   |
|                           |                       |                                               | Abdominal pain                        | 0      | 72             | Sagaonkar 2009 |
|                           |                       |                                               | Constipation                          | 20     | 33             | Darwish 2017   |
|                           |                       |                                               |                                       | 18     | 90             | Sagaonkar 2009 |
|                           |                       |                                               | Diarrhoea                             | 2      | 56             | Bhavi 2017     |
|                           |                       |                                               | 1                                     | 73     | Sagaonkar 2009 |                |
| Gastritis                 |                       |                                               | 4                                     | 56     | Bhavi 2017     |                |
| Nausea and/or vomiting    |                       |                                               | 11                                    | 33     | Darwish 2017   |                |
|                           |                       |                                               | 14                                    | 86     | Sagaonkar 2009 |                |
|                           |                       |                                               | 8                                     | 56     | Bhavi 2017     |                |
|                           |                       |                                               | 13                                    | 33     | Darwish 2017   |                |
|                           |                       |                                               | 0                                     | 72     | Sagaonkar 2009 |                |
|                           |                       |                                               | 2                                     | 100    | Sharma 2004    |                |
| <b>Local/dicoloration</b> |                       |                                               | Skin staining at injection site       | 0      | 100            | Sharma 2004    |
| <b>Local/pain</b>         |                       |                                               | Burning/pain at the site of injection | 0      | 56             | Bhavi 2017     |
|                           |                       | Injection site reaction/inflammation/swelling | 0                                     | 33     | Darwish 2017   |                |
| <b>Muscular</b>           |                       | Arthralgia                                    | 0                                     | 100    | Sharma 2004    |                |
| <b>Other/Combined</b>     |                       | Side effects                                  | 10                                    | 44     | Neeru 2012     |                |
|                           |                       | Serious Adverse Events                        | 0                                     | 40     | NCT00746551    |                |
| <b>Systemic</b>           |                       | Allergic reaction                             | 0                                     | 33     | Darwish 2017   |                |
|                           |                       | Systemic reaction                             | 0                                     | 100    | Sharma 2004    |                |
| IFG                       |                       | GI                                            | Abdominal cramps                      | 2      | 24             | Symonds 1969   |
|                           |                       |                                               | Constipation                          | 4      | 24             | Symonds 1969   |

|              |                         |                                      |                               |                      |                         |                         |
|--------------|-------------------------|--------------------------------------|-------------------------------|----------------------|-------------------------|-------------------------|
|              |                         | Nausea and vomiting                  | 4                             | 24                   | <i>Symonds 1969</i>     |                         |
|              | <b>Other</b>            | Other symptoms                       | 3                             | 24                   | <i>Symonds 1969</i>     |                         |
| <b>IFS</b>   | <b>Cardiac</b>          | Change in blood pressure             | 0                             | 25                   | <i>Aggarwal 2012</i>    |                         |
|              |                         | Bradycardia                          | NR                            | NR                   | <i>Neogi 2019</i>       |                         |
| Tachycardia  |                         | 0                                    | 75                            | <i>Arzoo 2020</i>    |                         |                         |
| Hypertension |                         | NR                                   | NR                            | <i>Neogi 2019</i>    |                         |                         |
| Syncope      |                         | 1                                    | 124                           | <i>Breymann 2016</i> |                         |                         |
|              |                         |                                      |                               | NR                   | NR                      | <i>Neogi 2019</i>       |
|              |                         |                                      | Vasovagal due to apprehension | 0                    | 75                      | <i>Kumar 2005</i>       |
|              | <b>General</b>          | Altered Taste                        | 3                             | 25                   | <i>Aggarwal 2012</i>    |                         |
|              |                         | Bronchospasm                         | 0                             | 124                  | <i>Breymann 2016</i>    |                         |
|              |                         |                                      |                               | 1                    | 39                      | <i>Ortiz 2011</i>       |
|              |                         | Chest compression                    | NR                            | NR                   | <i>Neogi 2019</i>       |                         |
|              |                         | Dysgeusia                            | 0                             | 124                  | <i>Breymann 2016</i>    |                         |
|              |                         | Fever                                | 0                             | 25                   | <i>Aggarwal 2012</i>    |                         |
|              |                         |                                      |                               | 1                    | 50                      | <i>Gupta 2014</i>       |
|              |                         |                                      |                               | 0                    | 75                      | <i>Kumar 2005</i>       |
|              |                         |                                      |                               | 0                    | 75                      | <i>Mehta 2014</i>       |
|              |                         |                                      |                               | 0                    | 100                     | <i>Sharma 2004</i>      |
|              |                         |                                      | <i>immediate AE</i>           | NR                   | NR                      | <i>Neogi 2019</i>       |
|              |                         |                                      | <i>late AE</i>                | NR                   | NR                      | <i>Neogi 2019</i>       |
|              |                         |                                      |                               | 0                    | 59                      | <i>AlMomen 1996</i>     |
|              |                         |                                      | Itching all over body         | 1                    | 50                      | <i>Gupta 2014</i>       |
|              |                         |                                      | Itching and rash              | 0                    | 75                      | <i>Kumar 2005</i>       |
|              |                         |                                      | Malaise                       | 0                    | 75                      | <i>Kumar 2005</i>       |
|              |                         |                                      |                               | 0                    | 100                     | <i>Sharma 2004</i>      |
|              |                         |                                      | Metallic taste                | 5                    | 50                      | <i>Abhilashini 2014</i> |
|              |                         |                                      |                               | 0                    | 50                      | <i>Gupta 2014</i>       |
|              |                         |                                      |                               | 6                    | 75                      | <i>Mehta 2014</i>       |
|              |                         |                                      |                               | 1                    | 75                      | <i>Dalal 2018</i>       |
|              |                         |                                      | <i>immediate AE</i>           | NR                   | NR                      | <i>Neogi 2019</i>       |
|              |                         |                                      | <i>late AE</i>                | NR                   | NR                      | <i>Neogi 2019</i>       |
|              |                         | Pruritus                             | 0                             | 50                   | <i>Abhilashini 2014</i> |                         |
|              |                         |                                      | 1                             | 39                   | <i>Ortiz 2011</i>       |                         |
|              |                         | Rash                                 | 1                             | 124                  | <i>Breymann 2016</i>    |                         |
|              |                         | Rash and itching                     | 1                             | 100                  | <i>Sharma 2004</i>      |                         |
|              |                         | Rashes or pruritus                   | NR                            | NR                   | <i>Neogi 2019</i>       |                         |
|              |                         | Tightness and discomfort in the skin | 0                             | 59                   | <i>AlMomen 1996</i>     |                         |
|              |                         | Urticarial reactions                 | 0                             | 98                   | <i>Khalafallah 2010</i> |                         |
|              | <b>General/Pain</b>     | Severe systemic ache and arthralgia  | 0                             | 100                  | <i>Sharma 2004</i>      |                         |
|              | <b>General/Systemic</b> | Vasovagal attack                     | 0                             | 100                  | <i>Sharma 2004</i>      |                         |
| <b>GI</b>    |                         | Abdominal cramps                     | 1                             | 25                   | <i>Symonds 1969</i>     |                         |
|              |                         | Abdominal pain                       | 5                             | 124                  | <i>Breymann 2016</i>    |                         |
|              |                         |                                      | 1                             | 39                   | <i>Ortiz 2011</i>       |                         |
|              |                         |                                      | 60                            | 100                  | <i>Rezk 2016</i>        |                         |
|              |                         |                                      | 10                            | 75                   | <i>Arzoo 2020</i>       |                         |
|              |                         |                                      | 12                            | 50                   | <i>Gawai 2020</i>       |                         |
|              |                         |                                      | 1                             | 50                   | <i>Abhilashini 2014</i> |                         |
|              |                         |                                      | 2                             | 25                   | <i>Aggarwal 2012</i>    |                         |
|              |                         |                                      | 3                             | 124                  | <i>Breymann 2016</i>    |                         |
|              |                         |                                      | 0                             | 50                   | <i>Gupta 2014</i>       |                         |
|              |                         |                                      | 4                             | 50                   | <i>Kochhar 2013</i>     |                         |
|              |                         |                                      | 8                             | 75                   | <i>Kumar 2005</i>       |                         |
|              |                         |                                      | 3                             | 48                   | <i>Nappi 2009</i>       |                         |
|              |                         |                                      | NR                            | NR                   | <i>Neogi 2019</i>       |                         |
|              |                         |                                      | 9                             | 39                   | <i>Ortiz 2011</i>       |                         |
|              |                         |                                      | 60                            | 100                  | <i>Rezk 2016</i>        |                         |

|                        |                                         |     |                         |                         |
|------------------------|-----------------------------------------|-----|-------------------------|-------------------------|
| <b>GI</b>              |                                         | 5   | 100                     | <i>Sharma 2004</i>      |
|                        | Constipation                            | 1   | 25                      | <i>Symonds 1969</i>     |
|                        |                                         | 1   | 75                      | <i>Dalal 2018</i>       |
|                        |                                         | 11  | 24                      | <i>Santiago 2019</i>    |
|                        |                                         | 46  | 50                      | <i>Gawai 2020</i>       |
|                        | Constipation or Diarrhea                | 13  | 75                      | <i>Mehta 2014</i>       |
|                        | Dark stools                             | 17  | 24                      | <i>Santiago 2019</i>    |
|                        |                                         | 45  | 50                      | <i>Gawai 2020</i>       |
|                        | Diarrhoea                               | 2   | 50                      | <i>Abhilashini 2014</i> |
|                        |                                         | 5   | 25                      | <i>Aggarwal 2012</i>    |
|                        |                                         | 1   | 23                      | <i>Bayoumeu 2002</i>    |
|                        |                                         | 4   | 124                     | <i>Breymann 2016</i>    |
|                        |                                         | 0   | 50                      | <i>Gupta 2014</i>       |
|                        |                                         | 2   | 50                      | <i>Kochhar 2013</i>     |
|                        |                                         | 5   | 75                      | <i>Kumar 2005</i>       |
|                        |                                         | 0   | 48                      | <i>Nappi 2009</i>       |
|                        |                                         | 2   | 39                      | <i>Ortiz 2011</i>       |
|                        |                                         | 3   | 100                     | <i>Sharma 2004</i>      |
|                        |                                         | NR  | NR                      | <i>Neogi 2019</i>       |
|                        |                                         | 2   | 75                      | <i>Dalal 2018</i>       |
|                        | Dyspepsia                               | 6   | 50                      | <i>Abhilashini 2014</i> |
|                        |                                         | 3   | 124                     | <i>Breymann 2016</i>    |
|                        |                                         | 9   | 75                      | <i>Kumar 2005</i>       |
|                        |                                         | 10  | 100                     | <i>Sharma 2004</i>      |
|                        |                                         | 5   | 75                      | <i>Dalal 2018</i>       |
|                        | Epigastric pain                         | 0   | 39                      | <i>Ortiz 2011</i>       |
|                        |                                         | 2   | 48                      | <i>Nappi 2009</i>       |
|                        |                                         | 3   | 24                      | <i>Santiago 2019</i>    |
|                        | Epigastric discomfort                   | 0   | 50                      | <i>Gupta 2014</i>       |
|                        | Epigastric discomfort /Nausea/ Vomiting | 16  | 75                      | <i>Mehta 2014</i>       |
|                        | Gastritis                               | 3   | 25                      | <i>Aggarwal 2012</i>    |
|                        |                                         | NR  | NR                      | <i>Neogi 2019</i>       |
|                        | GI upset                                | 18  | 59                      | <i>AlMomen 1996</i>     |
|                        | 16                                      | 124 | <i>Breymann 2016</i>    |                         |
|                        | <i>mild</i> 27                          | 98  | <i>Khalafallah 2010</i> |                         |
|                        | 60                                      | 100 | <i>Rezk 2016</i>        |                         |
|                        | 42                                      | 50  | <i>Gawai 2020</i>       |                         |
| Heartburn              | 2                                       | 50  | <i>Kochhar 2013</i>     |                         |
|                        | 11                                      | 75  | <i>Arzoo 2020</i>       |                         |
| Hiccup                 | 0                                       | 50  | <i>Kochhar 2013</i>     |                         |
| Nausea and/or vomiting | NR                                      | NR  | <i>Neogi 2019</i>       |                         |
|                        | <i>Nausea</i> 2                         | 25  | <i>Aggarwal 2012</i>    |                         |
|                        | 4                                       | 50  | <i>Abhilashini 2014</i> |                         |
|                        | 2                                       | 25  | <i>Aggarwal 2012</i>    |                         |
|                        | 6                                       | 124 | <i>Breymann 2016</i>    |                         |
|                        | 3                                       | 50  | <i>Kochhar 2013</i>     |                         |
|                        | NR                                      | 30  | <i>Komolafe 2003</i>    |                         |
|                        | 18                                      | 39  | <i>Ortiz 2011</i>       |                         |
|                        | 18                                      | 24  | <i>Santiago 2019</i>    |                         |
|                        | <i>Vomiting</i> 3                       | 50  | <i>Abhilashini 2014</i> |                         |
|                        | 2                                       | 124 | <i>Breymann 2016</i>    |                         |
|                        | 2                                       | 75  | <i>Kumar 2005</i>       |                         |
|                        | 1                                       | 48  | <i>Nappi 2009</i>       |                         |
|                        | 11                                      | 39  | <i>Ortiz 2011</i>       |                         |
|                        | 30                                      | 100 | <i>Rezk 2016</i>        |                         |
|                        | 2                                       | 75  | <i>Dalal 2018</i>       |                         |
| <b>GI</b>              |                                         | 17  | 24                      | <i>Santiago 2019</i>    |

|                            |                                                    |                               |    |     |                  |
|----------------------------|----------------------------------------------------|-------------------------------|----|-----|------------------|
|                            |                                                    |                               | 31 | 50  | Gawai 2020       |
|                            |                                                    | <i>Nausea and vomiting</i>    | 0  | 50  | Gupta 2014       |
|                            |                                                    |                               | 4  | 25  | Symonds 1969     |
|                            |                                                    |                               | 12 | 75  | Arzoo 2020       |
| <b>Local/discoloration</b> | Skin staining                                      |                               | 0  | 100 | Sharma 2004      |
|                            |                                                    |                               | NR | 30  | Komolafe 2003    |
|                            |                                                    |                               | 0  | 75  | Kumar 2005       |
| <b>Local/pain</b>          | Local pain                                         |                               | 0  | 75  | Kumar 2005       |
|                            |                                                    | <i>Mild</i>                   | 0  | 100 | Sharma 2004      |
|                            |                                                    | <i>Severe</i>                 | 0  | 100 | Sharma 2004      |
|                            | Pain at the site of injection                      |                               | 0  | 75  | Mehta 2014       |
|                            |                                                    |                               | 1  | 50  | Gupta 2014       |
|                            |                                                    | <i>Mild</i>                   | NR | 30  | Komolafe 2003    |
|                            |                                                    | <i>Significant</i>            | NR | 30  | Komolafe 2003    |
| <b>Muscular</b>            | Arthralgia                                         |                               | 0  | 75  | Kumar 2005       |
|                            |                                                    |                               | NR | NR  | Neogi 2019       |
|                            | Myalgia                                            |                               | 0  | 50  | Abhilashini 2014 |
|                            |                                                    |                               | NR | NR  | Neogi 2019       |
| <b>Nervous System</b>      | Dizziness                                          |                               | 0  | 124 | Breymann 2016    |
|                            | Headache                                           |                               | 0  | 25  | Aggarwal 2012    |
|                            |                                                    |                               | 1  | 124 | Breymann 2016    |
|                            |                                                    |                               | 1  | 50  | Kochhar 2013     |
|                            |                                                    |                               | NR | 30  | Komolafe 2003    |
|                            |                                                    |                               | NR | NR  | Neogi 2019       |
|                            |                                                    |                               | 2  | 39  | Ortiz 2011       |
|                            | Headache and giddiness                             |                               | 0  | 100 | Sharma 2004      |
|                            | Immediate headache and giddiness                   |                               | 0  | 75  | Kumar 2005       |
|                            | Nervous system disorders                           |                               | 1  | 124 | Breymann 2016    |
| <b>Other</b>               | Could not tolerate drug                            |                               | 4  | 59  | AlMomen 1996     |
|                            | General disorders & administration-site conditions |                               | 0  | 124 | Breymann 2016    |
|                            | Change in taste                                    |                               | 0  | 23  | Bayoumeu 2002    |
|                            | Other symptoms                                     |                               | 3  | 25  | Symonds 1969     |
|                            | Side effects                                       |                               | 16 | 75  | Kumar 2005       |
|                            | Unable to tolerate the drug                        |                               | 7  | 98  | Khalafallah 2010 |
|                            | Want to stop intake                                |                               | 20 | 100 | Rezk 2016        |
| <b>Pain</b>                | Arthritis                                          |                               | 0  | 25  | Aggarwal 2012    |
|                            | Back pain                                          |                               | 1  | 39  | Ortiz 2011       |
| <b>Systemic</b>            | Anaphylaxis Grade 1                                |                               | 0  | 25  | Aggarwal 2012    |
|                            | Anaphylaxis Grade 2                                |                               | 0  | 25  | Aggarwal 2012    |
|                            | Anaphylactic reaction                              |                               | NR | NR  | Neogi 2019       |
|                            | Allergic reaction                                  |                               | 1  | 75  | Arzoo 2020       |
|                            | Systemic ache                                      |                               | 0  | 75  | Kumar 2005       |
|                            |                                                    |                               | 0  | 100 | Sharma 2004      |
| <b>Vascular</b>            | Thrombophlebitis                                   |                               | 0  | 25  | Aggarwal 2012    |
|                            |                                                    |                               | NR | NR  | Neogi 2019       |
|                            |                                                    |                               | 2  | 50  | Gupta 2014       |
|                            | Phlebitis                                          |                               | 0  | 75  | Mehta 2014       |
|                            | Vascular disorders                                 |                               | 0  | 124 | Breymann 2016    |
| <b>IMISCA</b>              | <b>Cardiac</b>                                     | Tachycardia                   | 3  | 65  | Nanthini 2017    |
|                            |                                                    | Vasovagal due to apprehension | 1  | 75  | Kumar 2005       |
|                            | <b>General</b>                                     | Fever                         | 4  | 75  | Kumar 2005       |
|                            |                                                    |                               | 4  | 65  | Nanthini 2017    |
|                            |                                                    | Itching and rash              | 8  | 73  | Kumar 2005       |
|                            |                                                    | Malaise                       | 2  | 75  | Kumar 2005       |
|                            | <b>GI</b>                                          | Abdominal pain                | 0  | 50  | Singh 2012       |
|                            |                                                    | Constipation                  | 0  | 75  | Kumar 2005       |



|                            |                                  |                                           |    |                      |                      |
|----------------------------|----------------------------------|-------------------------------------------|----|----------------------|----------------------|
|                            | Diarrhoea                        | 0                                         | 75 | <i>Kumar 2005</i>    |                      |
|                            | Dyspepsia                        | 0                                         | 75 | <i>Kumar 2005</i>    |                      |
|                            | Gastritis                        | 2                                         | 30 | <i>Dhanani 2012</i>  |                      |
|                            | Nausea and vomiting              | 8                                         | 65 | <i>Nanthini 2017</i> |                      |
|                            |                                  | 2                                         | 30 | <i>Dhanani 2012</i>  |                      |
|                            | Vomiting                         | 0                                         | 75 | <i>Kumar 2005</i>    |                      |
| <b>Local</b>               | Itching at injection site        | 0                                         | 65 | <i>Nanthini 2017</i> |                      |
|                            | Swelling                         | 15                                        | 65 | <i>Nanthini 2017</i> |                      |
|                            |                                  | 5                                         | 30 | <i>Dhanani 2012</i>  |                      |
| <b>Local/discoloration</b> | Skin staining                    | 7                                         | 30 | <i>Dhanani 2012</i>  |                      |
|                            |                                  | 5                                         | 50 | <i>Singh 2012</i>    |                      |
|                            |                                  | 26                                        | 75 | <i>Kumar 2005</i>    |                      |
|                            |                                  | 13                                        | 65 | <i>Nanthini 2017</i> |                      |
| <b>Local/pain</b>          | Burning at the site of injection | 11                                        | 30 | <i>Dhanani 2012</i>  |                      |
|                            |                                  | 0                                         | 65 | <i>Nanthini 2017</i> |                      |
|                            | Local pain                       | 30                                        | 75 | <i>Kumar 2005</i>    |                      |
|                            |                                  | 6                                         | 50 | <i>Singh 2012</i>    |                      |
|                            |                                  | 23                                        | 65 | <i>Nanthini 2017</i> |                      |
| <b>Muscular</b>            | Arthralgia                       | 2                                         | 75 | <i>Kumar 2005</i>    |                      |
| <b>Nervous system</b>      | Headache                         | 6                                         | 65 | <i>Nanthini 2017</i> |                      |
|                            | Immediate headache and giddiness | 2                                         | 75 | <i>Kumar 2005</i>    |                      |
|                            | Giddiness                        | 4                                         | 30 | <i>Dhanani 2012</i>  |                      |
|                            | Shivering and weakness           | 0                                         | 50 | <i>Singh 2012</i>    |                      |
| <b>Other</b>               | Regional lymphadenopathy         | 5                                         | 65 | <i>Nanthini 2017</i> |                      |
|                            | Side effects                     | 40                                        | 75 | <i>Kumar 2005</i>    |                      |
| <b>Systemic</b>            | Systemic ache                    | 6                                         | 75 | <i>Kumar 2005</i>    |                      |
| <b>Vascular</b>            | Local phlebitis                  | 0                                         | 50 | <i>Singh 2012</i>    |                      |
| <b>IPMCX</b>               | <b>General</b>                   | Bronchospasm                              | 0  | 41                   | <i>Ortiz 2011</i>    |
|                            |                                  | Pruritus                                  | 0  | 41                   | <i>Ortiz 2011</i>    |
|                            | <b>GI</b>                        | Abdominal pain                            | 0  | 41                   | <i>Ortiz 2011</i>    |
|                            |                                  | Constipation                              | 1  | 41                   | <i>Ortiz 2011</i>    |
|                            |                                  | Diarrhoea                                 | 4  | 41                   | <i>Ortiz 2011</i>    |
|                            |                                  | GI upset*                                 | 13 | 45                   | <i>Al 2005</i>       |
|                            |                                  | Epigastric pain                           | 1  | 41                   | <i>Ortiz 2011</i>    |
|                            |                                  | Nausea                                    | 7  | 41                   | <i>Ortiz 2011</i>    |
|                            |                                  | Vomiting                                  | 2  | 41                   | <i>Ortiz 2011</i>    |
|                            | <b>Nervous System</b>            | Headache                                  | 4  | 41                   | <i>Ortiz 2011</i>    |
|                            | <b>Pain</b>                      | Back pain                                 | 0  | 41                   | <i>Ortiz 2011</i>    |
| <b>IVIDX</b>               | <b>Cardiac</b>                   | Low blood pressure                        | 1  | 105                  | <i>Tariq 2015</i>    |
|                            |                                  | Palpitation                               | 1  | 105                  | <i>Tariq 2015</i>    |
|                            | <b>General</b>                   | Heat intolerance                          | 1  | 105                  | <i>Tariq 2015</i>    |
|                            | <b>GI</b>                        | Abdominal cramps                          | 0  | 27                   | <i>Symonds 1969</i>  |
|                            |                                  | Constipation                              | 0  | 33                   | <i>Darwish 2017</i>  |
|                            |                                  |                                           | 1  | 27                   | <i>Symonds 1969</i>  |
|                            |                                  | Epigastric discomfort                     | 0  | 33                   | <i>Darwish 2017</i>  |
|                            |                                  | Nausea                                    | 0  | 33                   | <i>Darwish 2017</i>  |
|                            |                                  | Nausea and vomiting                       | 0  | 27                   | <i>Symonds 1969</i>  |
|                            |                                  | Vomiting                                  | 0  | 33                   | <i>Darwish 2017</i>  |
|                            | <b>Local</b>                     | Local injection site inflammation         | 1  | 33                   | <i>Darwish 2017</i>  |
|                            | <b>Muscular</b>                  | Small joint stiffness                     | 1  | 105                  | <i>Tariq 2015</i>    |
|                            | <b>Nervous system</b>            | Shivering                                 | 2  | 105                  | <i>Tariq 2015</i>    |
|                            | <b>Other</b>                     | Other symptoms                            | 2  | 27                   | <i>Symonds 1969</i>  |
|                            | <b>Systemic</b>                  | Allergic reaction                         | 1  | 33                   | <i>Darwish 2017</i>  |
| <b>IVIFCM</b>              | <b>Biomarkers</b>                | High level of serum transaminases at 3wks | 1  | 50                   | <i>Jose 2019</i>     |
|                            |                                  | Hypophosphatemia (early treatment)        | 2  | 50                   | <i>Jose 2019</i>     |
|                            | <b>General</b>                   | Dysgeusia                                 | 2  | 123                  | <i>Breymann 2016</i> |

|                       |                                                    |                                               |                         |                      |                      |
|-----------------------|----------------------------------------------------|-----------------------------------------------|-------------------------|----------------------|----------------------|
|                       | Rash                                               | 0                                             | 123                     | <i>Breymann 2016</i> |                      |
|                       | Bronchospasm                                       | 1                                             | 123                     | <i>Breymann 2016</i> |                      |
| <b>GI</b>             | Abdominal pain                                     | 0                                             | 123                     | <i>Breymann 2016</i> |                      |
|                       | Epigastric pain                                    | NR                                            | 50                      | <i>Jose 2019</i>     |                      |
|                       | Constipation                                       | 0                                             | 123                     | <i>Breymann 2016</i> |                      |
|                       | Diarrhoea                                          | 0                                             | 123                     | <i>Breymann 2016</i> |                      |
|                       | Dyspepsia                                          | 0                                             | 123                     | <i>Breymann 2016</i> |                      |
|                       | GI upset                                           | 3                                             | 123                     | <i>Breymann 2016</i> |                      |
|                       | Nausea                                             | 2                                             | 123                     | <i>Breymann 2016</i> |                      |
|                       | Vomiting                                           | 0                                             | 123                     | <i>Breymann 2016</i> |                      |
|                       | <b>Local/reaction</b>                              | Injection site reaction/inflammation/swelling | 1                       | 50                   | <i>Jose 2019</i>     |
| <b>Nervous System</b> | Dizziness                                          | 3                                             | 123                     | <i>Breymann 2016</i> |                      |
|                       | Headache                                           | 4                                             | 123                     | <i>Breymann 2016</i> |                      |
|                       | Nervous system disorders                           | 7                                             | 123                     | <i>Breymann 2016</i> |                      |
|                       | Syncope                                            | 0                                             | 123                     | <i>Breymann 2016</i> |                      |
| <b>Other</b>          | General disorders & administration-site conditions | 4                                             | 123                     | <i>Breymann 2016</i> |                      |
|                       | Anaphylactic reaction                              | 0                                             | 80                      | <i>Rajwani 2020</i>  |                      |
|                       | Refused treatment                                  | 2                                             | 80                      | <i>Rajwani 2020</i>  |                      |
| <b>Vascular</b>       | Vascular disorders                                 | 2                                             | 123                     | <i>Breymann 2016</i> |                      |
|                       | Venous thrombosis                                  | 0                                             | 80                      | <i>Rajwani 2020</i>  |                      |
| <b>IVISU</b>          | <b>Biomarkers</b>                                  | Hypophosphatemia (early treatment)            | 3                       | 50                   | <i>Jose 2019</i>     |
|                       | <b>Cardiac</b>                                     | Bradycardia                                   | 1                       | 970                  | <i>Neogi 2019</i>    |
|                       |                                                    | Hypotension                                   | 3                       | 970                  | <i>Neogi 2019</i>    |
|                       |                                                    | Hypertension                                  | 1                       | 970                  | <i>Neogi 2019</i>    |
|                       |                                                    | Syncope                                       | 1                       | 970                  | <i>Neogi 2019</i>    |
|                       |                                                    | Tachycardia                                   | 0                       | 62                   | <i>Nanthini 2017</i> |
|                       |                                                    |                                               | 1                       | 75                   | <i>Arzoo 2020</i>    |
|                       |                                                    | Venous Thrombosis                             | 0                       | 80                   | <i>Rajwani 2020</i>  |
|                       | <b>General</b>                                     | Chest compression                             | 3                       | 970                  | <i>Neogi 2019</i>    |
|                       |                                                    | Fever                                         | 1                       | 52                   | <i>AlMomen 1996</i>  |
|                       |                                                    |                                               | 1                       | 25                   | <i>Aggarwal 2012</i> |
|                       |                                                    |                                               | 0                       | 50                   | <i>Gupta 2014</i>    |
|                       |                                                    |                                               | 5                       | 75                   | <i>Mehta 2014</i>    |
|                       |                                                    |                                               | 2                       | 62                   | <i>Nanthini 2017</i> |
|                       |                                                    |                                               | 21                      | 970                  | <i>Neogi 2019</i>    |
|                       |                                                    |                                               | 79                      | 970                  | <i>Neogi 2019</i>    |
|                       |                                                    |                                               | 2                       | 100                  | <i>Rudra 2016</i>    |
|                       |                                                    |                                               | 1                       | 75                   | <i>Dalal 2018</i>    |
|                       |                                                    |                                               | 1                       | 93                   | <i>Tariq 2015</i>    |
|                       |                                                    | 2                                             | 100                     | <i>Deeba 2012</i>    |                      |
|                       | 0                                                  | 25                                            | <i>Aggarwal 2012</i>    |                      |                      |
|                       | 1                                                  | 50                                            | <i>Abhilashini 2014</i> |                      |                      |
|                       | 0                                                  | 50                                            | <i>Gupta 2014</i>       |                      |                      |
|                       | 1                                                  | 100                                           | <i>Rudra 2016</i>       |                      |                      |
|                       | 5                                                  | 75                                            | <i>Dalal 2018</i>       |                      |                      |
|                       | 2                                                  | 970                                           | <i>Neogi 2019</i>       |                      |                      |
|                       | 1                                                  | 93                                            | <i>Tariq 2015</i>       |                      |                      |
|                       | 0                                                  | 50                                            | <i>Abhilashini 2014</i> |                      |                      |
|                       | 5                                                  | 100                                           | <i>Deeba 2012</i>       |                      |                      |
|                       | 2                                                  | 50                                            | <i>Gupta 2014</i>       |                      |                      |
| <b>General</b>        |                                                    | 0                                             | 75                      | <i>Mehta 2014</i>    |                      |
|                       |                                                    | 6                                             | 970                     | <i>Neogi 2019</i>    |                      |
|                       |                                                    | 0                                             | 970                     | <i>Neogi 2019</i>    |                      |
|                       |                                                    | NR                                            | 100                     | <i>Rudra 2016</i>    |                      |
|                       | Altered Taste                                      | 4                                             | 25                      | <i>Aggarwal 2012</i> |                      |

|                            |                                         |     |                         |                         |
|----------------------------|-----------------------------------------|-----|-------------------------|-------------------------|
|                            | Palpitation                             | 2   | 93                      | <i>Tariq 2015</i>       |
|                            | Regional lymphadenopathy                | 0   | 62                      | <i>Nanthini 2017</i>    |
|                            | Tightness and discomfort in the skin    | 1   | 52                      | <i>AlMomen 1996</i>     |
| <b>GI</b>                  | Abdominal pain                          | 2   | 50                      | <i>Jose 2019</i>        |
|                            |                                         | 1   | 50                      | <i>Singh 2012</i>       |
|                            |                                         | 1   | 75                      | <i>Arzoo 2020</i>       |
|                            | Epigastric discomfort /Nausea/ Vomiting | 0   | 75                      | <i>Mehta 201</i>        |
|                            | Epigastric discomfort and bloating      | NR  | 100                     | <i>Rudra 2016</i>       |
|                            | Abdominal discomfort                    | 10  | 50                      | <i>Gupta 2014</i>       |
|                            | Constipation                            | 0   | 50                      | <i>Abhilashini 2014</i> |
|                            |                                         | 0   | 25                      | <i>Aggarwal 2012</i>    |
|                            |                                         | 9   | 50                      | <i>Gupta 2014</i>       |
|                            |                                         | 2   | 50                      | <i>Kochhar 2013</i>     |
|                            |                                         | 4   | 970                     | <i>Neogi 2019</i>       |
|                            | Constipation/ Diarrhoea                 | 0   | 75                      | <i>Mehta 2014</i>       |
|                            | Diarrhoea                               | 0   | 50                      | <i>Abhilashini 2014</i> |
|                            |                                         | 0   | 25                      | <i>Aggarwal 2012</i>    |
|                            |                                         | 0   | 24                      | <i>AlMomen 1996</i>     |
|                            |                                         | 1   | 24                      | <i>Bayoumeu 2002</i>    |
|                            |                                         | 0   | 56                      | <i>Bhavi 2017</i>       |
|                            |                                         | 0   | 100                     | <i>Deeba 2012</i>       |
|                            |                                         | 1   | 50                      | <i>Gupta 2014</i>       |
|                            |                                         | 0   | 50                      | <i>Kochhar 2013</i>     |
|                            |                                         | 10  | 970                     | <i>Neogi 2019</i>       |
|                            |                                         | NR  | 100                     | <i>Rudra 2016</i>       |
|                            | Dyspepsia                               | 0   | 50                      | <i>Abhilashini 2014</i> |
|                            | Gastritis                               | 0   | 25                      | <i>Aggarwal 2012</i>    |
|                            |                                         | 0   | 56                      | <i>Bhavi 2017</i>       |
|                            |                                         | 0   | 30                      | <i>Dhanani 2012</i>     |
|                            |                                         | 4   | 970                     | <i>Neogi 2019</i>       |
| Heartburn                  | 1                                       | 50  | <i>Kochhar 2013</i>     |                         |
| Hiccup                     | 0                                       | 50  | <i>Kochhar 2013</i>     |                         |
| Nausea and/or vomiting     | 0                                       | 50  | <i>Abhilashini 2014</i> |                         |
|                            | 0                                       | 25  | <i>Aggarwal 2012</i>    |                         |
|                            | 4                                       | 100 | <i>Deeba 2012</i>       |                         |
|                            | 0                                       | 50  | <i>Kochhar 2013</i>     |                         |
|                            | 0                                       | 56  | <i>Bhavi 2017</i>       |                         |
|                            | 0                                       | 30  | <i>Dhanani 2012</i>     |                         |
|                            | 1                                       | 50  | <i>Gupta 2014</i>       |                         |
|                            | 2                                       | 62  | <i>Nanthini 2017</i>    |                         |
|                            | 4                                       | 100 | <i>Rudra 2016</i>       |                         |
|                            | Nausea Vomiting                         | NR  | 100                     |                         |
|                            | Nausea (immediate AE)                   | 20  | 970                     | <i>Neogi 2019</i>       |
|                            | Vomiting (immediate AE)                 | 14  | 970                     | <i>Neogi 2019</i>       |
|                            | Nausea (late AE)                        | 14  | 970                     | <i>Neogi 2019</i>       |
|                            | Vomiting (late AE)                      | 46  | 970                     | <i>Neogi 2019</i>       |
| GI upset                   |                                         | 6   | 45                      | <i>Al 2005</i>          |
|                            |                                         | 0   | 52                      | <i>AlMomen 1996</i>     |
|                            |                                         | 0   | 100                     | <i>Deeba 2012</i>       |
| <b>Local/discoloration</b> | Skin staining at injection site         | 0   | 30                      | <i>Dhanani 2012</i>     |
|                            |                                         | 0   | 62                      | <i>Nanthini 2017</i>    |
|                            | Skin staining at injection site         | 0   | 50                      | <i>Singh 2012</i>       |
| <b>Local/pain</b>          | Burning/pain at the site of injection   | 6   | 56                      | <i>Bhavi 2017</i>       |
|                            |                                         | 1   | 30                      | <i>Dhanani 2012</i>     |
|                            |                                         | 0   | 50                      | <i>Gupta 2014</i>       |
|                            |                                         | 15  | 75                      | <i>Mehta 2014</i>       |
|                            |                                         | 11  | 62                      | <i>Nanthini 2017</i>    |

|                       |                                                  |                        |     |                      |                         |                     |
|-----------------------|--------------------------------------------------|------------------------|-----|----------------------|-------------------------|---------------------|
|                       |                                                  |                        | 0   | 50                   | <i>Singh 2012</i>       |                     |
| <b>Local/reaction</b> | Injection site<br>reaction/inflammation/swelling |                        | 1   | 30                   | <i>Dhanani_2012</i>     |                     |
|                       |                                                  |                        | 2   | 50                   | <i>Jose 2019</i>        |                     |
|                       |                                                  |                        | 3   | 62                   | <i>Nanthini 2017</i>    |                     |
|                       |                                                  |                        | 4   | 100                  | <i>Rudra 2016</i>       |                     |
| <b>Local/vascular</b> | Local phlebitis                                  |                        | 2   | 50                   | <i>Singh 2012</i>       |                     |
| <b>Muscular</b>       | Arthralgia                                       |                        | 1   | 100                  | <i>Deeba 2012</i>       |                     |
|                       |                                                  |                        | 20  | 970                  | <i>Neogi 2019</i>       |                     |
|                       |                                                  |                        | 1   | 100                  | <i>Rudra 2016</i>       |                     |
| <b>Nervous System</b> | Small joint stiffness                            |                        | 5   | 93                   | <i>Tariq 2015</i>       |                     |
|                       | Dizziness                                        |                        | 1   | 100                  | <i>Deeba_2012</i>       |                     |
|                       | Giddiness                                        |                        | 0   | 30                   | <i>Dhanani 2012</i>     |                     |
|                       | Headache                                         |                        | 0   | 25                   | <i>Aggarwal 2012</i>    |                     |
|                       |                                                  |                        | 0   | 50                   | <i>Kochhar 2013</i>     |                     |
|                       |                                                  | 3                      | 62  | <i>Nanthini 2017</i> |                         |                     |
|                       |                                                  | 52                     | 970 | <i>Neogi 2019</i>    |                         |                     |
|                       |                                                  | 3                      | 75  | <i>Dalal 2018</i>    |                         |                     |
| <b>Other</b>          | Shivering                                        |                        | 1   | 93                   | <i>Tariq 2015</i>       |                     |
|                       | Shivering and weakness                           |                        | 1   | 50                   | <i>Singh 2012</i>       |                     |
|                       | Could not tolerate drug                          |                        | 0   | 52                   | <i>AlMomen 1996</i>     |                     |
|                       | Not-unpleasant taste during injection            |                        | 1   | 24                   | <i>Bayoumeu 2002</i>    |                     |
|                       | Serious Adverse Events                           |                        | 0   | 40                   | <i>NCT00746551</i>      |                     |
|                       |                                                  |                        | 0   | 100                  | <i>Rudra 2016</i>       |                     |
| <b>Pain</b>           | Side effects                                     |                        | 6   | 45                   | <i>Neeru 2012</i>       |                     |
|                       | Myalgia                                          |                        | 1   | 50                   | <i>Abhilashini 2014</i> |                     |
|                       |                                                  |                        | 49  | 970                  | <i>Neogi 2019</i>       |                     |
|                       | Arthritis                                        |                        | 1   | 25                   | <i>Aggarwal 2012</i>    |                     |
| <b>Systemic</b>       | Anaphylaxis Grade 1                              |                        | 2   | 25                   | <i>Aggarwal 2012</i>    |                     |
|                       | Anaphylaxis Grade 2                              |                        | 0   | 25                   | <i>Aggarwal 2012</i>    |                     |
|                       | Anaphylactic reaction                            |                        | 0   | 970                  | <i>Neogi 2019</i>       |                     |
| <b>Vascular</b>       | Phlebitis                                        |                        | 6   | 75                   | <i>Mehta 2014</i>       |                     |
|                       |                                                  |                        | 1   | 25                   | <i>Aggarwal 2012</i>    |                     |
|                       | Thrombophlebitis                                 |                        | 0   | 50                   | <i>Gupta 2014</i>       |                     |
|                       |                                                  |                        | 43  | 970                  | <i>Neogi 2019</i>       |                     |
| <b>LAC</b>            | <b>GI</b>                                        | Abdominal pain         |     | 1                    | 49                      | <i>Nappi 2009</i>   |
|                       |                                                  |                        |     | 20                   | 100                     | <i>Rezk 2016</i>    |
|                       |                                                  |                        |     | 5                    | 50                      | <i>Gawai 2020</i>   |
|                       |                                                  | Constipation           |     | 1                    | 49                      | <i>Nappi 2009</i>   |
|                       |                                                  |                        |     | 20                   | 100                     | <i>Rezk 2016</i>    |
|                       |                                                  |                        |     | 7                    | 50                      | <i>Gawai 2020</i>   |
|                       |                                                  | Dark stools            |     | 0                    | 100                     | <i>Rezk 2016</i>    |
|                       |                                                  |                        |     | 0                    | 50                      | <i>Gawai 2020</i>   |
|                       |                                                  | Diarrhoea              |     | 0                    | 49                      | <i>Nappi 2009</i>   |
|                       |                                                  | GI upset               |     | 10                   | 100                     | <i>Rezk 2016</i>    |
|                       |                                                  |                        |     | 15                   | 50                      | <i>Gawai 2020</i>   |
|                       |                                                  | Nausea and/or vomiting |     | 1                    | 49                      | <i>Nappi 2009</i>   |
|                       |                                                  |                        |     | 10                   | 100                     | <i>Rezk 2016</i>    |
|                       |                                                  |                        |     | 9                    | 50                      | <i>Gawai 2020</i>   |
| <b>LAC</b>            | <b>Other</b>                                     | Want to stop intake    |     | 0                    | 100                     | <i>Rezk 2016</i>    |
|                       |                                                  | Acceptability          |     | 48                   | 50                      | <i>Gawai 2020</i>   |
| <b>NOFE</b>           | <b>GI</b>                                        | Abdominal cramps       |     | 0                    | 27                      | <i>Symonds 1969</i> |
|                       |                                                  | Constipation           |     | 4                    | 27                      | <i>Symonds 1969</i> |
|                       |                                                  | Nausea and/or vomiting |     | 1                    | 27                      | <i>Symonds 1969</i> |
|                       | <b>Other</b>                                     | Other symptoms         |     | 1                    | 27                      | <i>Symonds 1969</i> |

IAAC, iron amino acid chelate; IFS, ferrous sulphate; FASG, ferrous asparto glycinate; ICARB, carbonyl iron; ICSAC, iron chondroitinsulfuric acid complex; IFA, ferrous ascorbate; IFF, ferrous fumarate; IFG, ferrous gluconate;

**IMISCA**, intramuscular iron sorbitol citric acid; **IPMCX**, Iron polymaltose complex; **IVIDX**, intravenous iron dextran; **IVIFCM**, intravenous ferric carboxymaltose; **IVISU**, intravenous iron sucrose; **LAC**, Lactoferrin; **NOFE**, “no-iron intervention” (placebo/vitamin/no intervention); **NR**, non reported.

Accepted version

**Appendix 10** Upcoming trials evaluating effect of iron preparation in iron deficient anaemia in pregnancy

| Clinical trial CT registration ID | Country     | Comparison                                                | Sample size | Outcomes                                                                                                                                                                                |
|-----------------------------------|-------------|-----------------------------------------------------------|-------------|-----------------------------------------------------------------------------------------------------------------------------------------------------------------------------------------|
| NCT00802139                       | South Korea | Iron acetyl-transferase vs Iron sucrose                   | 58          | Change in Hb level at achievement rate (11g saturation, Sf, TIBC, change in reticulocyte                                                                                                |
| NCT03481790                       | Egypt       | Lactoferrin vs Ferrous sulphate + Folic Acid              | 200         | Hb at 4 wks, Sf at 4 w                                                                                                                                                                  |
| NCT02086838                       | Egypt       | Theragran Hematinic vs iron dextran (IV)                  | 212         | The proportion of patients successfully treated and participants with adverse                                                                                                           |
| NCT03484845                       | Egypt       | Lactoferrin vs Ferrous fumarate                           | 150         | Increase in blood Hb                                                                                                                                                                    |
| NCT03657433                       | US          | Ferumoxytol (IV) vs Ferrous sulphate                      | 140         | Change in Hb, Change laboratory values, maternal outcomes                                                                                                                               |
| NCT04278651                       | US          | Ferumoxytol (IV) vs Ferrous sulphate                      | 80          | Change in Hb level at resolution, Anemia at Adherence, Need for transfusion, neonatal                                                                                                   |
| NCT04253626                       | US          | Ferumoxytol (IV) vs Ferrous sulphate                      | 80          | Change in Hb level at                                                                                                                                                                   |
| NCT03202615                       | Egypt       | Lactoferrin vs Ferrous sulphate                           | 130         | Change in Hb (1, 2 months (1, 2 mths), change in parameters, cost, safety                                                                                                               |
| NCT03188445                       | Denmark     | Iron Isomaltoside (IV) vs Ferrous fumarate with vitamin C | 201         | Achievement of Hb $\geq$ 120g/L Achievement of Hb $\geq$ 120g/L time points, change in                                                                                                  |
| NCT03438227                       | US          | Ferrous sulphate vs iron dextran (IV)                     | 120         | Hb at delivery, maternal outcomes, safety, blood                                                                                                                                        |
| NCT03456258                       | Egypt       | Lactoferrin vs Ferrous fumarate                           | 100         | Hb at 8 wks, Sf at 8 w                                                                                                                                                                  |
| ACTRN12617001634369               | Bangladesh  | Lactoferrin vs Ferrous sulphate                           | 608         | Hb at 24 & 34 wks of gestation & 34 wks of gestation values, maternal and adherence, safety                                                                                             |
| Clinical trial CT registration ID | Country     | Comparison                                                | Sample size | Outcomes                                                                                                                                                                                |
| ACTRN12614000988651               | Australia   | Lactoferrin vs Ferrous sulphate                           | 800         | Change in Hb, Change laboratory values, maternal outcomes, quality of life                                                                                                              |
| EudraCT 2017-000994-35            | Spain       | Ferric pyrophosphate vs Ferrous sulphate                  | 130         | Efficacy, Quality of life perinatal outcomes                                                                                                                                            |
| EudraCT 2010-018940-15            | Germany     | Ferrous (II) glycine sulphate complex vs IFG              | 40          | Change in Hb                                                                                                                                                                            |
| CTRI/2019/02/017553               | India       | Ferric carboxymaltose (IV) vs Iron sucrose (IV)           | 100         | Improvement in anaemia haematological assessment safety, maternal and infant Hb and Sf at 4 & 8 weeks iron, RBC indices, need transfusion, perinatal postpartum haemorrhage transfusion |
| CTRI/2018/12/016771               | India       | Ferric carboxymaltose (IV) vs Iron sucrose (IV)           | 200         | transfusion, perinatal postpartum haemorrhage transfusion                                                                                                                               |
| CTRI/2018/12/016537               | India       | Tab-Dhatrilauha vs cap-Autrin                             | 100         | Sf, Serum total iron binding                                                                                                                                                            |

|                      |       |                                                       |     |                                                                        |
|----------------------|-------|-------------------------------------------------------|-----|------------------------------------------------------------------------|
| CTRI/2017/06/008884  | India | Ferric carboxymaltose (IV) vs Ferrous sulphate        | 173 | No details available                                                   |
| CTRI/2015/07/006049  | India | Dhatri Lauha vs Punarnava Mandura vs Ferrous sulphate | 35  | Improvement in signs<br>Garbhini Pandu, Incre                          |
| CTRI/2014/01/004369  | India | Ferric carboxymaltose (IV) vs Iron sucrose (IV)       | 230 | Hb (mean change) at                                                    |
| CTRI/2013/11/004142  | India | Iron sucrose (IV) vs Ferrous sulphate                 | 100 | No details available                                                   |
| CTRI/2009/091/001077 | India | Iron sucrose (IV) vs Ferrous fumarate                 | 100 | Improvement in blood<br>reticulocyte response,<br>Clinical improvement |

*Hb, haemoglobin; Sf, serum ferritin; wks, weeks; IV, intravenous; RBC, red blood cell*

Accepted version
